# Supplementary material
Source: publisher figshare collection journal article supplement (https://tandf.figshare.com/ndownloader/files/17458082)
Supplement: Supplementary file 1 [file 17458082]

**Supplementary table 4** U-Pb data of LA-ICP-MS ananlyses of detrital zircons from meta-sedimentay rocks of the Wuguan Complex

| Spot | Th(ppm) | U(ppm) | Th/U | Isotopic ratios | | | | | | |  | | Ages(Ma) | | | | | | | Concordance |
| --- | --- | --- | --- | --- | --- | --- | --- | --- | --- | --- | --- | --- | --- | --- | --- | --- | --- | --- | --- | --- |
| 207Pb/206Pb | | 1σ | 207Pb/235U | 1σ | 206Pb/238U | 1σ |  | | 207Pb/206Pb | | 1σ | 207Pb/235U | 1σ | 206Pb/238U | 1σ |
| Sample SL1-2 | | | | | | | | | | | | | | | | | | | | |
| 01 | 51.9 | 110 | 0.47 | 0.0558 | | 0.0039 | 0.5439 | 0.0381 | 0.0712 | 0.0020 |  | | 442 | | 147 | 441 | 25 | 443 | 12 | 100 |
| 02 | 108 | 288 | 0.38 | 0.1164 | | 0.0044 | 5.3222 | 0.1964 | 0.3300 | 0.0088 |  | | 1901 | | 47 | 1872 | 32 | 1838 | 43 | 98 |
| 03 | 337 | 482 | 0.70 | 0.0716 | | 0.0026 | 1.3796 | 0.0509 | 0.1390 | 0.0037 |  | | 974 | | 53 | 880 | 22 | 839 | 21 | 95 |
| 04 | 82.5 | 166 | 0.50 | 0.0874 | | 0.0034 | 2.7830 | 0.1089 | 0.2301 | 0.0063 |  | | 1369 | | 55 | 1351 | 29 | 1335 | 33 | 99 |
| 05 | 103 | 335 | 0.31 | 0.0677 | | 0.0029 | 1.3880 | 0.0627 | 0.1480 | 0.0042 |  | | 858 | | 75 | 884 | 27 | 889 | 23 | 99 |
| 06 | 338 | 916 | 0.37 | 0.0641 | | 0.0024 | 1.1493 | 0.0432 | 0.1295 | 0.0035 |  | | 744 | | 56 | 777 | 20 | 785 | 20 | 99 |
| 07 | 136 | 321 | 0.42 | 0.0690 | | 0.0027 | 1.3523 | 0.0533 | 0.1415 | 0.0038 |  | | 899 | | 60 | 869 | 23 | 853 | 22 | 98 |
| 08 | 354 | 570 | 0.62 | 0.0658 | | 0.0024 | 1.2450 | 0.0458 | 0.1363 | 0.0036 |  | | 801 | | 54 | 821 | 21 | 824 | 21 | 100 |
| 09 | 170 | 484 | 0.35 | 0.0776 | | 0.0028 | 2.1180 | 0.0759 | 0.1968 | 0.0053 |  | | 1136 | | 48 | 1155 | 25 | 1158 | 28 | 100 |
| 10 | 85.9 | 196 | 0.44 | 0.0877 | | 0.0033 | 3.1208 | 0.1170 | 0.2566 | 0.0069 |  | | 1376 | | 51 | 1438 | 29 | 1473 | 36 | 98 |
| 11 | 280 | 239 | 1.17 | 0.0745 | | 0.0029 | 1.7404 | 0.0694 | 0.1681 | 0.0047 |  | | 1055 | | 59 | 1024 | 26 | 1001 | 26 | 98 |
| 12 | 34.4 | 97.4 | 0.35 | 0.0554 | | 0.0047 | 0.5331 | 0.0425 | 0.0698 | 0.0021 |  | | 427 | | 195 | 434 | 28 | 435 | 13 | 100 |
| 13 | 127 | 284 | 0.45 | 0.0589 | | 0.0043 | 0.6776 | 0.0451 | 0.0835 | 0.0024 |  | | 562 | | 164 | 525 | 27 | 517 | 15 | 98 |
| 14 | 115 | 189 | 0.61 | 0.0609 | | 0.0032 | 0.5881 | 0.0300 | 0.0698 | 0.0019 |  | | 635 | | 94 | 470 | 19 | 435 | 12 | 92 |
| 15 | 48.9 | 125 | 0.39 | 0.0739 | | 0.0052 | 1.2846 | 0.0816 | 0.1261 | 0.0037 |  | | 1039 | | 145 | 839 | 36 | 765 | 21 | 91 |
| 16 | 195 | 318 | 0.61 | 0.0794 | | 0.0034 | 1.7453 | 0.0736 | 0.1579 | 0.0044 |  | | 1182 | | 64 | 1025 | 27 | 945 | 24 | 92 |
| 17 | 92.7 | 260 | 0.36 | 0.1220 | | 0.0047 | 5.5457 | 0.2083 | 0.3267 | 0.0088 |  | | 1986 | | 48 | 1908 | 32 | 1822 | 43 | 95 |
| 18 | 245 | 391 | 0.63 | 0.0842 | | 0.0032 | 2.3776 | 0.0887 | 0.2031 | 0.0055 |  | | 1297 | | 52 | 1236 | 27 | 1192 | 29 | 96 |
| 19 | 313 | 186 | 1.68 | 0.0903 | | 0.0034 | 3.0621 | 0.1154 | 0.2435 | 0.0067 |  | | 1432 | | 51 | 1423 | 29 | 1405 | 35 | 99 |
| 20 | 154 | 221 | 0.70 | 0.1294 | | 0.0046 | 6.5974 | 0.2318 | 0.3670 | 0.0099 |  | | 2090 | | 41 | 2059 | 31 | 2015 | 47 | 98 |
| 21 | 336 | 557 | 0.60 | 0.0586 | | 0.0022 | 0.5869 | 0.0224 | 0.0719 | 0.0020 |  | | 553 | | 59 | 469 | 14 | 448 | 12 | 95 |
| 22 | 402 | 606 | 0.66 | 0.0591 | | 0.0022 | 0.5996 | 0.0228 | 0.0729 | 0.0020 |  | | 570 | | 59 | 477 | 14 | 454 | 12 | 95 |
| 23 | 461 | 921 | 0.50 | 0.0614 | | 0.0026 | 0.6566 | 0.0284 | 0.0773 | 0.0022 |  | | 652 | | 72 | 513 | 17 | 480 | 13 | 93 |
| 24 | 54.0 | 72.7 | 0.74 | 0.0569 | | 0.0035 | 0.5695 | 0.0326 | 0.0731 | 0.0023 |  | | 489 | | 109 | 458 | 21 | 455 | 14 | 99 |
| 25 | 306 | 139 | 2.19 | 0.1679 | | 0.0068 | 11.1739 | 0.4430 | 0.4787 | 0.0132 |  | | 2537 | | 49 | 2538 | 37 | 2521 | 57 | 99 |
| 26 | 221 | 502 | 0.44 | 0.1853 | | 0.0069 | 13.3435 | 0.5001 | 0.5179 | 0.0143 |  | | 2701 | | 43 | 2704 | 35 | 2690 | 61 | 99 |
| 27 | 446 | 238 | 1.87 | 0.1677 | | 0.0063 | 11.4164 | 0.4352 | 0.4984 | 0.0155 |  | | 2534 | | 38 | 2558 | 36 | 2607 | 67 | 98 |
| 28 | 52.6 | 38.9 | 1.35 | 0.0997 | | 0.0109 | 4.2827 | 0.4435 | 0.3115 | 0.0109 |  | | 1619 | | 212 | 1690 | 85 | 1748 | 54 | 97 |
| 29 | 177 | 158 | 1.12 | 0.0701 | | 0.0030 | 1.4146 | 0.0601 | 0.1459 | 0.0040 |  | | 931 | | 68 | 895 | 25 | 878 | 23 | 98 |
| 30 | 99.6 | 550 | 0.18 | 0.0549 | | 0.0023 | 0.5397 | 0.0230 | 0.0710 | 0.0019 |  | | 408 | | 76 | 438 | 15 | 442 | 12 | 99 |
| 31 | 72.9 | 151 | 0.48 | 0.1707 | | 0.0065 | 12.0948 | 0.4694 | 0.5103 | 0.0140 |  | | 2565 | | 47 | 2612 | 36 | 2658 | 60 | 98 |
| 32 | 42.6 | 84.8 | 0.50 | 0.1683 | | 0.0062 | 11.7355 | 0.4355 | 0.5042 | 0.0139 |  | | 2541 | | 43 | 2584 | 35 | 2632 | 59 | 98 |
| 33 | 186 | 675 | 0.27 | 0.0617 | | 0.0023 | 1.0314 | 0.0396 | 0.1206 | 0.0033 |  | | 663 | | 59 | 720 | 20 | 734 | 19 | 98 |
| 34 | 172 | 327 | 0.53 | 0.0671 | | 0.0026 | 1.4271 | 0.0543 | 0.1534 | 0.0042 |  | | 842 | | 57 | 900 | 23 | 920 | 23 | 98 |
| 35 | 186 | 406 | 0.46 | 0.0981 | | 0.0037 | 3.3319 | 0.1308 | 0.2445 | 0.0071 |  | | 1589 | | 51 | 1489 | 31 | 1410 | 37 | 95 |
| 36 | 81.9 | 134 | 0.61 | 0.0872 | | 0.0036 | 3.2023 | 0.1314 | 0.2654 | 0.0075 |  | | 1364 | | 59 | 1458 | 32 | 1518 | 38 | 96 |
| 37 | 170 | 543 | 0.31 | 0.0537 | | 0.0022 | 0.5333 | 0.0216 | 0.0716 | 0.0020 |  | | 359 | | 69 | 434 | 14 | 446 | 12 | 97 |
| 38 | 350 | 573 | 0.61 | 0.0530 | | 0.0021 | 0.5416 | 0.0215 | 0.0739 | 0.0020 |  | | 327 | | 67 | 439 | 14 | 460 | 12 | 95 |
| 39 | 198 | 295 | 0.67 | 0.0678 | | 0.0027 | 1.2649 | 0.0491 | 0.1354 | 0.0037 |  | | 863 | | 58 | 830 | 22 | 819 | 21 | 99 |
| 40 | 471 | 599 | 0.79 | 0.0679 | | 0.0025 | 1.3474 | 0.0511 | 0.1435 | 0.0040 |  | | 867 | | 54 | 866 | 22 | 865 | 23 | 100 |
| 41 | 225 | 832 | 0.27 | 0.0644 | | 0.0024 | 0.9955 | 0.0389 | 0.1110 | 0.0031 |  | | 755 | | 59 | 702 | 20 | 679 | 18 | 97 |
| 42 | 17.1 | 20.1 | 0.85 | 0.1028 | | 0.0055 | 4.2163 | 0.2225 | 0.2998 | 0.0087 |  | | 1675 | | 83 | 1677 | 43 | 1690 | 43 | 99 |
| 43 | 182 | 488 | 0.37 | 0.0731 | | 0.0026 | 1.7732 | 0.0639 | 0.1750 | 0.0047 |  | | 1016 | | 50 | 1036 | 23 | 1039 | 26 | 100 |
| 44 | 201 | 625 | 0.32 | 0.0722 | | 0.0026 | 1.6430 | 0.0592 | 0.1660 | 0.0047 |  | | 991 | | 47 | 987 | 23 | 990 | 26 | 100 |
| 45 | 125 | 108 | 1.16 | 0.0664 | | 0.0032 | 1.1289 | 0.0527 | 0.1234 | 0.0035 |  | | 820 | | 79 | 767 | 25 | 750 | 20 | 98 |
| 46 | 121 | 137 | 0.88 | 0.0598 | | 0.0035 | 0.5869 | 0.0338 | 0.0712 | 0.0020 |  | | 598 | | 111 | 469 | 22 | 443 | 12 | 94 |
| 47 | 196 | 352 | 0.56 | 0.1094 | | 0.0040 | 4.6995 | 0.1710 | 0.3096 | 0.0083 |  | | 1789 | | 46 | 1767 | 30 | 1739 | 41 | 98 |
| 48 | 126 | 534 | 0.24 | 0.0694 | | 0.0026 | 1.3334 | 0.0494 | 0.1387 | 0.0037 |  | | 912 | | 53 | 860 | 21 | 837 | 21 | 97 |
| 49 | 142 | 518 | 0.27 | 0.0613 | | 0.0024 | 0.9128 | 0.0363 | 0.1076 | 0.0029 |  | | 650 | | 64 | 659 | 19 | 659 | 17 | 100 |
| 50 | 292 | 975 | 0.30 | 0.0800 | | 0.0030 | 2.1782 | 0.0826 | 0.1971 | 0.0053 |  | | 1196 | | 54 | 1174 | 26 | 1160 | 28 | 99 |
| 51 | 64.0 | 81.4 | 0.79 | 0.1698 | | 0.0063 | 11.1340 | 0.4206 | 0.4761 | 0.0129 |  | | 2556 | | 45 | 2534 | 35 | 2510 | 56 | 99 |
| 52 | 163 | 926 | 0.18 | 0.0681 | | 0.0024 | 1.4557 | 0.0532 | 0.1551 | 0.0042 |  | | 871 | | 52 | 912 | 22 | 930 | 23 | 98 |
| 53 | 226 | 163 | 1.39 | 0.1491 | | 0.0051 | 8.6227 | 0.3069 | 0.4202 | 0.0112 |  | | 2336 | | 41 | 2299 | 32 | 2261 | 51 | 98 |
| 54 | 375 | 259 | 1.45 | 0.0708 | | 0.0028 | 1.1786 | 0.0490 | 0.1206 | 0.0033 |  | | 952 | | 66 | 791 | 23 | 734 | 19 | 93 |
| 55 | 72.4 | 202 | 0.36 | 0.0840 | | 0.0031 | 2.3757 | 0.1060 | 0.2040 | 0.0068 |  | | 1292 | | 60 | 1235 | 32 | 1197 | 36 | 97 |
| 56 | 87.0 | 160 | 0.54 | 0.0544 | | 0.0029 | 0.4867 | 0.0261 | 0.0653 | 0.0019 |  | | 388 | | 104 | 403 | 18 | 407 | 11 | 99 |
| 57 | 87.5 | 155 | 0.57 | 0.0527 | | 0.0026 | 0.5152 | 0.0253 | 0.0714 | 0.0021 |  | | 318 | | 93 | 422 | 17 | 445 | 12 | 95 |
| 58 | 122 | 215 | 0.57 | 0.0581 | | 0.0025 | 0.7500 | 0.0337 | 0.0933 | 0.0026 |  | | 533 | | 79 | 568 | 20 | 575 | 15 | 99 |
| 59 | 276 | 228 | 1.21 | 0.0585 | | 0.0026 | 0.5934 | 0.0262 | 0.0741 | 0.0021 |  | | 550 | | 75 | 473 | 17 | 461 | 13 | 97 |
| 60 | 63.3 | 48.8 | 1.30 | 0.0640 | | 0.0035 | 1.2688 | 0.0687 | 0.1439 | 0.0042 |  | | 741 | | 99 | 832 | 31 | 866 | 23 | 96 |
| 61 | 159 | 360 | 0.44 | 0.0641 | | 0.0023 | 1.2045 | 0.0429 | 0.1353 | 0.0037 |  | | 746 | | 50 | 803 | 20 | 818 | 21 | 98 |
| 62 | 70.4 | 51.5 | 1.37 | 0.1232 | | 0.0048 | 6.1460 | 0.2401 | 0.3594 | 0.0100 |  | | 2004 | | 50 | 1997 | 34 | 1979 | 48 | 99 |
| 63 | 157 | 226 | 0.70 | 0.0668 | | 0.0027 | 1.3534 | 0.0537 | 0.1456 | 0.0040 |  | | 833 | | 62 | 869 | 23 | 876 | 22 | 99 |
| 64 | 263 | 465 | 0.56 | 0.0649 | | 0.0027 | 1.2849 | 0.0527 | 0.1424 | 0.0039 |  | | 771 | | 66 | 839 | 23 | 858 | 22 | 98 |
| 65 | 127 | 313 | 0.40 | 0.0666 | | 0.0030 | 1.4452 | 0.0636 | 0.1562 | 0.0044 |  | | 824 | | 72 | 908 | 26 | 936 | 25 | 97 |
| 66 | 208 | 351 | 0.59 | 0.0885 | | 0.0036 | 2.3465 | 0.0986 | 0.1909 | 0.0061 |  | | 1392 | | 54 | 1226 | 30 | 1126 | 33 | 91 |
| 67 | 161 | 377 | 0.43 | 0.1348 | | 0.0050 | 7.5261 | 0.2866 | 0.4003 | 0.0109 |  | | 2162 | | 47 | 2176 | 34 | 2171 | 50 | 100 |
| 68 | 155 | 263 | 0.59 | 0.0565 | | 0.0026 | 0.5720 | 0.0259 | 0.0731 | 0.0020 |  | | 471 | | 82 | 459 | 17 | 455 | 12 | 99 |
| 69 | 703 | 520 | 1.35 | 0.0986 | | 0.0035 | 3.8757 | 0.1373 | 0.2828 | 0.0076 |  | | 1598 | | 44 | 1609 | 29 | 1606 | 38 | 100 |
| 70 | 56.0 | 140 | 0.40 | 0.0725 | | 0.0033 | 1.9136 | 0.0872 | 0.1910 | 0.0054 |  | | 1001 | | 74 | 1086 | 30 | 1127 | 29 | 96 |
| 71 | 83.3 | 208 | 0.40 | 0.0581 | | 0.0030 | 0.5279 | 0.0270 | 0.0660 | 0.0018 |  | | 535 | | 96 | 430 | 18 | 412 | 11 | 96 |
| 72 | 71.5 | 91.8 | 0.78 | 0.1019 | | 0.0042 | 3.8437 | 0.1586 | 0.2725 | 0.0076 |  | | 1659 | | 57 | 1602 | 33 | 1554 | 39 | 97 |
| 73 | 336 | 445 | 0.75 | 0.0572 | | 0.0023 | 0.5871 | 0.0232 | 0.0742 | 0.0020 |  | | 499 | | 65 | 469 | 15 | 461 | 12 | 98 |
| 74 | 90.0 | 230 | 0.39 | 0.0779 | | 0.0030 | 2.0997 | 0.0788 | 0.1950 | 0.0053 |  | | 1144 | | 53 | 1149 | 26 | 1149 | 28 | 100 |
| 75 | 92.9 | 1037 | 0.09 | 0.0702 | | 0.0025 | 1.4951 | 0.0521 | 0.1535 | 0.0041 |  | | 934 | | 47 | 928 | 21 | 920 | 23 | 99 |
| 76 | 137 | 216 | 0.63 | 0.0586 | | 0.0027 | 0.6304 | 0.0298 | 0.0779 | 0.0024 |  | | 551 | | 81 | 496 | 19 | 483 | 14 | 97 |
| 77 | 1.61 | 393 | 0.00 | 0.1184 | | 0.0042 | 5.4716 | 0.1924 | 0.3329 | 0.0089 |  | | 1932 | | 42 | 1896 | 30 | 1852 | 43 | 98 |
| 78 | 143 | 225 | 0.64 | 0.0582 | | 0.0029 | 0.6080 | 0.0297 | 0.0758 | 0.0021 |  | | 539 | | 90 | 482 | 19 | 471 | 13 | 98 |
| 79 | 61.8 | 142 | 0.43 | 0.0801 | | 0.0036 | 1.7717 | 0.0904 | 0.1574 | 0.0050 |  | | 1200 | | 81 | 1035 | 33 | 942 | 28 | 91 |
| 80 | 123 | 178 | 0.69 | 0.0705 | | 0.0030 | 1.4170 | 0.0589 | 0.1454 | 0.0040 |  | | 942 | | 66 | 896 | 25 | 875 | 22 | 98 |
| Sample SL3-3 | | | | | | | | | | | | | | | | | | | | |
| 01 | 170 | 366 | 0.46 | 0.06404 | 0.00230 | | 1.25296 | 0.04469 | 0.14073 | 0.00373 | |  | | 743 | 52 | 825 | 20 | 849 | 21 | 97 |
| 02 | 644 | 531 | 1.21 | 0.07283 | 0.00270 | | 1.71565 | 0.06368 | 0.16908 | 0.00443 | |  | | 1009 | 55 | 1014 | 24 | 1007 | 24 | 99 |
| 03 | 71.8 | 88.1 | 0.81 | 0.11951 | 0.00479 | | 6.17937 | 0.21463 | 0.36974 | 0.00984 | |  | | 1949 | 41 | 2002 | 30 | 2028 | 46 | 99 |
| 04 | 49.7 | 53.1 | 0.94 | 0.10349 | 0.00412 | | 4.44830 | 0.17445 | 0.31013 | 0.00839 | |  | | 1688 | 54 | 1721 | 33 | 1741 | 41 | 99 |
| 05 | 45.3 | 75.7 | 0.60 | 0.11101 | 0.00433 | | 5.15589 | 0.19862 | 0.33427 | 0.00886 | |  | | 1816 | 52 | 1845 | 33 | 1859 | 43 | 99 |
| 06 | 681 | 626 | 1.09 | 0.05581 | 0.00212 | | 0.56257 | 0.02098 | 0.07266 | 0.00191 | |  | | 445 | 60 | 453 | 14 | 452 | 11 | 100 |
| 07 | 1169 | 379 | 3.09 | 0.05576 | 0.00227 | | 0.55419 | 0.02304 | 0.07151 | 0.00192 | |  | | 443 | 72 | 448 | 15 | 445 | 12 | 99 |
| 08 | 69.5 | 99.0 | 0.70 | 0.10932 | 0.00380 | | 5.00688 | 0.17152 | 0.33014 | 0.00873 | |  | | 1788 | 41 | 1820 | 29 | 1839 | 42 | 99 |
| 09 | 383 | 290 | 1.32 | 0.07220 | 0.00241 | | 1.64555 | 0.05440 | 0.16407 | 0.00431 | |  | | 992 | 42 | 988 | 21 | 979 | 24 | 99 |
| 10 | 144 | 317 | 0.46 | 0.06616 | 0.00246 | | 1.22170 | 0.04644 | 0.13272 | 0.00354 | |  | | 812 | 58 | 811 | 21 | 803 | 20 | 99 |
| 11 | 31.4 | 140 | 0.22 | 0.06854 | 0.00303 | | 1.68093 | 0.07419 | 0.17645 | 0.00491 | |  | | 885 | 73 | 1001 | 28 | 1048 | 27 | 95 |
| 12 | 227 | 417 | 0.55 | 0.15759 | 0.00513 | | 10.06939 | 0.32741 | 0.45878 | 0.01209 | |  | | 2430 | 33 | 2441 | 30 | 2434 | 53 | 100 |
| 13 | 759 | 736 | 1.03 | 0.06458 | 0.00230 | | 1.14150 | 0.04048 | 0.12687 | 0.00336 | |  | | 761 | 51 | 773 | 19 | 770 | 19 | 100 |
| 14 | 28.6 | 60.5 | 0.47 | 0.05643 | 0.00414 | | 0.63977 | 0.04471 | 0.08255 | 0.00246 | |  | | 469 | 144 | 502 | 28 | 511 | 15 | 98 |
| 15 | 261 | 313 | 0.83 | 0.05464 | 0.00266 | | 0.55970 | 0.02649 | 0.07389 | 0.00205 | |  | | 397 | 88 | 451 | 17 | 460 | 12 | 98 |
| 16 | 172 | 186 | 0.93 | 0.05585 | 0.00271 | | 0.58060 | 0.02694 | 0.07545 | 0.00213 | |  | | 446 | 84 | 465 | 17 | 469 | 13 | 99 |
| 17 | 164 | 179 | 0.92 | 0.05604 | 0.00284 | | 0.58070 | 0.02943 | 0.07471 | 0.00213 | |  | | 454 | 95 | 465 | 19 | 464 | 13 | 100 |
| 18 | 313 | 456 | 0.69 | 0.05397 | 0.00210 | | 0.57690 | 0.02211 | 0.07694 | 0.00210 | |  | | 370 | 62 | 462 | 14 | 478 | 13 | 97 |
| 19 | 191 | 397 | 0.48 | 0.06430 | 0.00240 | | 1.29018 | 0.04768 | 0.14428 | 0.00398 | |  | | 752 | 53 | 841 | 21 | 869 | 22 | 97 |
| 20 | 129 | 592 | 0.22 | 0.08335 | 0.00310 | | 2.84791 | 0.10166 | 0.23992 | 0.00656 | |  | | 1277 | 46 | 1368 | 27 | 1386 | 34 | 99 |
| 21 | 114 | 142 | 0.80 | 0.06295 | 0.00283 | | 1.20933 | 0.05380 | 0.13544 | 0.00381 | |  | | 706 | 75 | 805 | 25 | 819 | 22 | 98 |
| 22 | 555 | 504 | 1.10 | 0.05483 | 0.00215 | | 0.51302 | 0.02038 | 0.06769 | 0.00184 | |  | | 405 | 66 | 420 | 14 | 422 | 11 | 100 |
| 23 | 125 | 177 | 0.70 | 0.05601 | 0.00281 | | 0.57099 | 0.02848 | 0.07417 | 0.00207 | |  | | 453 | 94 | 459 | 18 | 461 | 12 | 100 |
| 24 | 152 | 197 | 0.77 | 0.06502 | 0.00257 | | 1.23075 | 0.04914 | 0.13740 | 0.00375 | |  | | 775 | 63 | 815 | 22 | 830 | 21 | 98 |
| 25 | 220 | 325 | 0.68 | 0.05297 | 0.00229 | | 0.52559 | 0.02309 | 0.07207 | 0.00197 | |  | | 328 | 80 | 429 | 15 | 449 | 12 | 95 |
| 26 | 78.9 | 82.0 | 0.96 | 0.13010 | 0.00476 | | 7.62058 | 0.29199 | 0.42540 | 0.01162 | |  | | 2099 | 48 | 2187 | 34 | 2285 | 53 | 96 |
| 27 | 138 | 416 | 0.33 | 0.11939 | 0.00402 | | 5.59075 | 0.19537 | 0.33960 | 0.00899 | |  | | 1947 | 42 | 1915 | 30 | 1885 | 43 | 98 |
| 28 | 181 | 419 | 0.43 | 0.11228 | 0.00365 | | 5.09983 | 0.17119 | 0.32937 | 0.00878 | |  | | 1837 | 38 | 1836 | 28 | 1835 | 43 | 100 |
| 29 | 87.8 | 184 | 0.48 | 0.16456 | 0.00534 | | 11.52647 | 0.38641 | 0.50725 | 0.01351 | |  | | 2503 | 35 | 2567 | 31 | 2645 | 58 | 97 |
| 30 | 524 | 782 | 0.67 | 0.05436 | 0.00206 | | 0.56752 | 0.02201 | 0.07567 | 0.00205 | |  | | 386 | 64 | 456 | 14 | 470 | 12 | 97 |
| 31 | 336 | 206 | 1.63 | 0.05692 | 0.00250 | | 0.53546 | 0.02309 | 0.06858 | 0.00188 | |  | | 489 | 75 | 435 | 15 | 428 | 11 | 98 |
| 32 | 92.0 | 120 | 0.77 | 0.06924 | 0.00277 | | 1.36096 | 0.05513 | 0.14261 | 0.00393 | |  | | 906 | 63 | 872 | 24 | 859 | 22 | 98 |
| 33 | 138 | 177 | 0.78 | 0.08051 | 0.00299 | | 2.17626 | 0.08129 | 0.19591 | 0.00523 | |  | | 1209 | 53 | 1173 | 26 | 1153 | 28 | 98 |
| 34 | 102 | 850 | 0.12 | 0.07120 | 0.00253 | | 1.54338 | 0.05521 | 0.15707 | 0.00420 | |  | | 963 | 50 | 948 | 22 | 940 | 23 | 99 |
| 35 | 185 | 298 | 0.62 | 0.07037 | 0.00286 | | 1.28240 | 0.05208 | 0.13229 | 0.00360 | |  | | 939 | 63 | 838 | 23 | 801 | 21 | 95 |
| 36 | 332 | 464 | 0.72 | 0.06999 | 0.00263 | | 1.32461 | 0.04975 | 0.13687 | 0.00366 | |  | | 928 | 55 | 857 | 22 | 827 | 21 | 96 |
| 37 | 231 | 317 | 0.73 | 0.07300 | 0.00276 | | 1.72194 | 0.06505 | 0.17049 | 0.00460 | |  | | 1014 | 55 | 1017 | 24 | 1015 | 25 | 100 |
| 38 | 83.9 | 126 | 0.67 | 0.19016 | 0.00657 | | 13.48241 | 0.46814 | 0.51102 | 0.01365 | |  | | 2744 | 37 | 2714 | 33 | 2661 | 58 | 98 |
| 39 | 117 | 158 | 0.74 | 0.11429 | 0.00413 | | 5.14202 | 0.18554 | 0.32388 | 0.00866 | |  | | 1869 | 45 | 1843 | 31 | 1809 | 42 | 98 |
| 40 | 81.6 | 178 | 0.46 | 0.11390 | 0.00412 | | 5.16549 | 0.18764 | 0.32598 | 0.00881 | |  | | 1863 | 45 | 1847 | 31 | 1819 | 43 | 98 |
| 41 | 135 | 130 | 1.04 | 0.07312 | 0.00316 | | 1.67122 | 0.07232 | 0.16428 | 0.00458 | |  | | 1017 | 69 | 998 | 27 | 981 | 25 | 98 |
| 42 | 131 | 180 | 0.73 | 0.06553 | 0.00277 | | 1.20268 | 0.05066 | 0.13206 | 0.00359 | |  | | 791 | 69 | 802 | 23 | 800 | 20 | 100 |
| 43 | 55.8 | 144 | 0.39 | 0.06885 | 0.00305 | | 1.30277 | 0.05794 | 0.13599 | 0.00369 | |  | | 894 | 75 | 847 | 26 | 822 | 21 | 97 |
| 44 | 87.9 | 188 | 0.47 | 0.15230 | 0.00561 | | 9.35119 | 0.34132 | 0.44204 | 0.01187 | |  | | 2372 | 43 | 2373 | 33 | 2360 | 53 | 99 |
| 45 | 51.5 | 282 | 0.18 | 0.09626 | 0.00381 | | 2.27648 | 0.10003 | 0.16916 | 0.00523 | |  | | 1553 | 60 | 1205 | 31 | 1007 | 29 | 82 |
| 46 | 721 | 1312 | 0.55 | 0.05452 | 0.00224 | | 0.52072 | 0.02148 | 0.06892 | 0.00191 | |  | | 393 | 70 | 426 | 14 | 430 | 11 | 99 |
| 47 | 95.1 | 171 | 0.55 | 0.06416 | 0.00267 | | 1.25096 | 0.05133 | 0.14126 | 0.00388 | |  | | 747 | 66 | 824 | 23 | 852 | 22 | 97 |
| 48 | 88.1 | 108 | 0.82 | 0.05660 | 0.00329 | | 0.56519 | 0.03175 | 0.07333 | 0.00209 | |  | | 476 | 110 | 455 | 21 | 456 | 13 | 100 |
| 49 | 476 | 370 | 1.29 | 0.06630 | 0.00248 | | 1.30046 | 0.04920 | 0.14156 | 0.00378 | |  | | 816 | 57 | 846 | 22 | 853 | 21 | 99 |
| 50 | 53.5 | 337 | 0.16 | 0.06780 | 0.00249 | | 1.48991 | 0.05461 | 0.15884 | 0.00424 | |  | | 862 | 53 | 926 | 22 | 950 | 24 | 97 |
| 51 | 30.5 | 86.6 | 0.35 | 0.15463 | 0.00518 | | 10.20826 | 0.34806 | 0.47734 | 0.01285 | |  | | 2398 | 36 | 2454 | 32 | 2516 | 56 | 98 |
| 52 | 219 | 356 | 0.62 | 0.05193 | 0.00200 | | 0.54153 | 0.02064 | 0.07563 | 0.00203 | |  | | 282 | 63 | 439 | 14 | 470 | 12 | 93 |
| 53 | 48.4 | 64.3 | 0.75 | 0.12728 | 0.00437 | | 7.27410 | 0.25497 | 0.41406 | 0.01139 | |  | | 2061 | 39 | 2146 | 31 | 2233 | 52 | 96 |
| 54 | 177 | 154 | 1.15 | 0.05508 | 0.00399 | | 0.53669 | 0.03963 | 0.07139 | 0.00239 | |  | | 416 | 151 | 436 | 26 | 445 | 14 | 98 |
| 55 | 267 | 310 | 0.86 | 0.15295 | 0.00529 | | 9.77875 | 0.34665 | 0.46241 | 0.01261 | |  | | 2379 | 39 | 2414 | 33 | 2450 | 56 | 99 |
| 56 | 14.2 | 560 | 0.03 | 0.10606 | 0.00353 | | 4.84672 | 0.16459 | 0.33011 | 0.00888 | |  | | 1733 | 39 | 1793 | 29 | 1839 | 43 | 97 |
| 57 | 22.2 | 38.4 | 0.58 | 0.07750 | 0.00400 | | 2.06996 | 0.09855 | 0.19708 | 0.00574 | |  | | 1134 | 77 | 1139 | 33 | 1160 | 31 | 98 |
| 58 | 146 | 135 | 1.08 | 0.08906 | 0.00340 | | 3.17204 | 0.12015 | 0.25776 | 0.00700 | |  | | 1405 | 52 | 1450 | 29 | 1478 | 36 | 98 |
| 59 | 107 | 336 | 0.32 | 0.07243 | 0.00256 | | 1.73836 | 0.06100 | 0.17320 | 0.00458 | |  | | 998 | 48 | 1023 | 23 | 1030 | 25 | 99 |
| 60 | 67.6 | 121 | 0.56 | 0.06659 | 0.00297 | | 1.26813 | 0.05490 | 0.13812 | 0.00385 | |  | | 825 | 71 | 832 | 25 | 834 | 22 | 100 |
| 61 | 200 | 163 | 1.23 | 0.05629 | 0.00278 | | 0.56542 | 0.02789 | 0.07264 | 0.00203 | |  | | 464 | 92 | 455 | 18 | 452 | 12 | 99 |
| 62 | 217 | 769 | 0.28 | 0.09808 | 0.00340 | | 3.83289 | 0.13398 | 0.28150 | 0.00774 | |  | | 1588 | 41 | 1600 | 28 | 1599 | 39 | 100 |
| 63 | 244 | 405 | 0.60 | 0.06691 | 0.00269 | | 1.30749 | 0.05184 | 0.14098 | 0.00377 | |  | | 835 | 62 | 849 | 23 | 850 | 21 | 100 |
| 64 | 68.7 | 181 | 0.38 | 0.21461 | 0.00793 | | 17.34176 | 0.63420 | 0.58183 | 0.01550 | |  | | 2941 | 41 | 2954 | 35 | 2956 | 63 | 100 |
| 65 | 326 | 272 | 1.20 | 0.06959 | 0.00307 | | 1.26600 | 0.05460 | 0.13160 | 0.00365 | |  | | 916 | 70 | 831 | 24 | 797 | 21 | 96 |
| 66 | 97.3 | 342 | 0.28 | 0.06825 | 0.00406 | | 1.17696 | 0.06190 | 0.12508 | 0.00347 | |  | | 876 | 127 | 790 | 29 | 760 | 20 | 96 |
| 67 | 169 | 321 | 0.53 | 0.07047 | 0.00293 | | 1.37400 | 0.05552 | 0.14041 | 0.00379 | |  | | 942 | 63 | 878 | 24 | 847 | 21 | 96 |
| 68 | 347 | 380 | 0.91 | 0.05610 | 0.00289 | | 0.52607 | 0.02194 | 0.06598 | 0.00181 | |  | | 456 | 71 | 429 | 15 | 412 | 11 | 96 |
| 69 | 165 | 115 | 1.44 | 0.06097 | 0.00356 | | 0.58267 | 0.03256 | 0.06985 | 0.00200 | |  | | 638 | 106 | 466 | 21 | 435 | 12 | 93 |
| 70 | 912 | 2619 | 0.35 | 0.20752 | 0.00734 | | 15.06682 | 0.53403 | 0.52233 | 0.01383 | |  | | 2886 | 39 | 2819 | 34 | 2709 | 59 | 96 |
| 71 | 51.8 | 58.5 | 0.89 | 0.07166 | 0.00396 | | 1.40372 | 0.07408 | 0.14373 | 0.00412 | |  | | 976 | 93 | 891 | 31 | 866 | 23 | 97 |
| 72 | 431 | 734 | 0.59 | 0.06870 | 0.00244 | | 1.36348 | 0.04847 | 0.14309 | 0.00377 | |  | | 890 | 51 | 873 | 21 | 862 | 21 | 99 |
| 73 | 68.1 | 147 | 0.46 | 0.06805 | 0.00294 | | 1.26695 | 0.05331 | 0.13444 | 0.00361 | |  | | 870 | 69 | 831 | 24 | 813 | 21 | 98 |
| 74 | 261 | 214 | 1.22 | 0.09625 | 0.01015 | | 3.24679 | 0.31962 | 0.24465 | 0.00928 | |  | | 1553 | 206 | 1468 | 76 | 1411 | 48 | 96 |
| 75 | 183 | 678 | 0.27 | 0.06501 | 0.00261 | | 1.21370 | 0.04674 | 0.13484 | 0.00357 | |  | | 775 | 60 | 807 | 21 | 815 | 20 | 99 |
| 76 | 609 | 1183 | 0.51 | 0.05606 | 0.00213 | | 0.59239 | 0.02255 | 0.07693 | 0.00205 | |  | | 455 | 62 | 472 | 14 | 478 | 12 | 99 |
| 77 | 123 | 146 | 0.84 | 0.05682 | 0.00303 | | 0.57751 | 0.03030 | 0.07501 | 0.00212 | |  | | 485 | 100 | 463 | 20 | 466 | 13 | 99 |
| 78 | 126 | 240 | 0.52 | 0.06949 | 0.00259 | | 1.47851 | 0.05417 | 0.15628 | 0.00420 | |  | | 913 | 52 | 922 | 22 | 936 | 23 | 98 |
| 79 | 446 | 465 | 0.96 | 0.05391 | 0.00220 | | 0.53009 | 0.02158 | 0.07233 | 0.00194 | |  | | 367 | 71 | 432 | 14 | 450 | 12 | 96 |
| 80 | 150 | 182 | 0.82 | 0.06627 | 0.00274 | | 1.23947 | 0.05031 | 0.13827 | 0.00377 | |  | | 815 | 64 | 819 | 23 | 835 | 21 | 98 |
| Sample SL4-2 | | | | | | | | | | | | | | | | | | | | |
| 01 | 50.2 | 79.7 | 0.63 | 0.07332 | 0.00736 | | 1.38812 | 0.13765 | 0.13715 | 0.00388 | |  | | 1023 | 200 | 884 | 59 | 829 | 22 | 94 |
| 02 | 463 | 469 | 0.99 | 0.05477 | 0.00234 | | 0.57314 | 0.02431 | 0.07559 | 0.00204 | |  | | 403 | 75 | 460 | 16 | 470 | 12 | 98 |
| 03 | 99.7 | 118 | 0.85 | 0.05125 | 0.00296 | | 0.54920 | 0.03140 | 0.07811 | 0.00231 | |  | | 252 | 115 | 444 | 21 | 485 | 14 | 91 |
| 04 | 101 | 337 | 0.30 | 0.07046 | 0.00320 | | 1.33544 | 0.06240 | 0.13726 | 0.00425 | |  | | 942 | 73 | 861 | 27 | 829 | 24 | 96 |
| 05 | 83.6 | 76.5 | 1.09 | 0.09691 | 0.00443 | | 4.13807 | 0.18942 | 0.30832 | 0.00858 | |  | | 1566 | 70 | 1662 | 37 | 1732 | 42 | 96 |
| 06 | 81.1 | 159 | 0.51 | 0.10322 | 0.00407 | | 4.38003 | 0.17065 | 0.30605 | 0.00828 | |  | | 1683 | 53 | 1709 | 32 | 1721 | 41 | 99 |
| 07 | 125 | 219 | 0.57 | 0.05715 | 0.00288 | | 0.55767 | 0.02847 | 0.07034 | 0.00197 | |  | | 497 | 96 | 450 | 19 | 438 | 12 | 97 |
| 08 | 259 | 164 | 1.58 | 0.07844 | 0.00318 | | 2.29135 | 0.09217 | 0.21053 | 0.00575 | |  | | 1158 | 60 | 1210 | 28 | 1232 | 31 | 98 |
| 09 | 210 | 311 | 0.68 | 0.05447 | 0.00257 | | 0.51542 | 0.02369 | 0.06835 | 0.00188 | |  | | 390 | 85 | 422 | 16 | 426 | 11 | 99 |
| 10 | 120 | 89.6 | 1.34 | 0.10008 | 0.00457 | | 3.62106 | 0.16251 | 0.26034 | 0.00720 | |  | | 1626 | 67 | 1554 | 36 | 1492 | 37 | 96 |
| 11 | 110 | 304 | 0.36 | 0.11295 | 0.00502 | | 5.05211 | 0.22461 | 0.32088 | 0.00864 | |  | | 1847 | 66 | 1828 | 38 | 1794 | 42 | 98 |
| 12 | 67.3 | 448 | 0.15 | 0.06915 | 0.00343 | | 1.53317 | 0.07665 | 0.15916 | 0.00434 | |  | | 903 | 89 | 944 | 31 | 952 | 24 | 99 |
| 13 | 53.7 | 35.5 | 1.51 | 0.16478 | 0.00917 | | 10.74764 | 0.60254 | 0.47022 | 0.01346 | |  | | 2505 | 83 | 2502 | 52 | 2485 | 59 | 99 |
| 14 | 467 | 514 | 0.91 | 0.07946 | 0.00478 | | 1.97328 | 0.12524 | 0.17673 | 0.00539 | |  | | 1184 | 113 | 1106 | 43 | 1049 | 30 | 95 |
| 15 | 84.3 | 113 | 0.75 | 0.06484 | 0.00474 | | 1.16720 | 0.08729 | 0.12908 | 0.00371 | |  | | 769 | 150 | 785 | 41 | 783 | 21 | 100 |
| 16 | 12.1 | 59.9 | 0.20 | 0.14863 | 0.00911 | | 9.11669 | 0.56726 | 0.44130 | 0.01270 | |  | | 2330 | 97 | 2350 | 57 | 2356 | 57 | 100 |
| 17 | 56.0 | 439 | 0.13 | 0.07949 | 0.00440 | | 2.01011 | 0.11151 | 0.18140 | 0.00488 | |  | | 1184 | 98 | 1119 | 38 | 1075 | 27 | 96 |
| 18 | 171 | 440 | 0.39 | 0.10767 | 0.00522 | | 5.24683 | 0.25422 | 0.34917 | 0.00931 | |  | | 1760 | 76 | 1860 | 41 | 1931 | 44 | 96 |
| 19 | 21.9 | 289 | 0.08 | 0.10285 | 0.00457 | | 4.65335 | 0.20450 | 0.32423 | 0.00864 | |  | | 1676 | 66 | 1759 | 37 | 1810 | 42 | 97 |
| 20 | 583 | 559 | 1.04 | 0.05623 | 0.00255 | | 0.57680 | 0.02535 | 0.07372 | 0.00205 | |  | | 461 | 77 | 462 | 16 | 459 | 12 | 99 |
| 21 | 136 | 212 | 0.64 | 0.06672 | 0.00285 | | 1.24377 | 0.05132 | 0.13416 | 0.00369 | |  | | 829 | 66 | 821 | 23 | 812 | 21 | 99 |
| 22 | 204 | 563 | 0.36 | 0.05618 | 0.00220 | | 0.64846 | 0.02490 | 0.08310 | 0.00226 | |  | | 459 | 61 | 508 | 15 | 515 | 13 | 99 |
| 23 | 349 | 678 | 0.52 | 0.05456 | 0.00233 | | 0.54128 | 0.02247 | 0.07154 | 0.00194 | |  | | 394 | 72 | 439 | 15 | 445 | 12 | 99 |
| 24 | 142 | 162 | 0.87 | 0.05736 | 0.00315 | | 0.58146 | 0.03152 | 0.07345 | 0.00216 | |  | | 505 | 103 | 465 | 20 | 457 | 13 | 98 |
| 25 | 353 | 484 | 0.73 | 0.05735 | 0.00264 | | 0.61532 | 0.02852 | 0.07723 | 0.00218 | |  | | 505 | 83 | 487 | 18 | 480 | 13 | 99 |
| 26 | 99 | 27.1 | 3.67 | 0.08591 | 0.00689 | | 1.56737 | 0.13354 | 0.13523 | 0.00504 | |  | | 1336 | 153 | 957 | 53 | 818 | 29 | 84 |
| 27 | 98.5 | 168 | 0.58 | 0.08731 | 0.00345 | | 3.08025 | 0.12171 | 0.25479 | 0.00705 | |  | | 1367 | 56 | 1428 | 30 | 1463 | 36 | 98 |
| 28 | 96.5 | 215 | 0.45 | 0.15486 | 0.00560 | | 9.30065 | 0.34691 | 0.43282 | 0.01214 | |  | | 2400 | 43 | 2368 | 34 | 2318 | 55 | 98 |
| 29 | 86.2 | 64.1 | 1.34 | 0.10757 | 0.00559 | | 4.79527 | 0.24276 | 0.32423 | 0.00930 | |  | | 1759 | 78 | 1784 | 43 | 1810 | 45 | 99 |
| 30 | 188 | 854 | 0.22 | 0.06631 | 0.00248 | | 1.49205 | 0.05651 | 0.16250 | 0.00443 | |  | | 816 | 56 | 927 | 23 | 971 | 25 | 95 |
| 31 | 265 | 245 | 1.08 | 0.06029 | 0.00275 | | 0.80100 | 0.03589 | 0.09628 | 0.00270 | |  | | 614 | 77 | 597 | 20 | 593 | 16 | 99 |
| 32 | 169 | 205 | 0.82 | 0.05954 | 0.00335 | | 0.59269 | 0.03257 | 0.07253 | 0.00208 | |  | | 587 | 104 | 473 | 21 | 451 | 13 | 95 |
| 33 | 329 | 383 | 0.86 | 0.05931 | 0.00267 | | 0.60052 | 0.02668 | 0.07297 | 0.00200 | |  | | 579 | 78 | 478 | 17 | 454 | 12 | 95 |
| 34 | 159 | 606 | 0.26 | 0.07019 | 0.00285 | | 1.51603 | 0.06070 | 0.15516 | 0.00423 | |  | | 934 | 62 | 937 | 24 | 930 | 24 | 99 |
| 35 | 413 | 365 | 1.13 | 0.08227 | 0.00365 | | 2.31878 | 0.09908 | 0.20288 | 0.00563 | |  | | 1252 | 65 | 1218 | 30 | 1191 | 30 | 98 |
| 36 | 106 | 431 | 0.25 | 0.06602 | 0.00283 | | 1.28394 | 0.05327 | 0.13992 | 0.00383 | |  | | 807 | 67 | 839 | 24 | 844 | 22 | 99 |
| 37 | 96.9 | 190 | 0.51 | 0.07066 | 0.00424 | | 0.65645 | 0.04039 | 0.06702 | 0.00199 | |  | | 947 | 113 | 512 | 25 | 418 | 12 | 80 |
| 38 | 222 | 417 | 0.53 | 0.09479 | 0.00359 | | 3.56269 | 0.13262 | 0.26986 | 0.00723 | |  | | 1524 | 50 | 1541 | 30 | 1540 | 37 | 100 |
| 39 | 129 | 170 | 0.76 | 0.06507 | 0.00311 | | 1.18708 | 0.05495 | 0.13176 | 0.00364 | |  | | 777 | 80 | 795 | 26 | 798 | 21 | 100 |
| 40 | 174 | 281 | 0.62 | 0.06530 | 0.00287 | | 1.24050 | 0.05381 | 0.13653 | 0.00376 | |  | | 784 | 72 | 819 | 24 | 825 | 21 | 99 |
| 41 | 102 | 144 | 0.71 | 0.06986 | 0.00345 | | 1.37389 | 0.06610 | 0.14348 | 0.00404 | |  | | 924 | 82 | 878 | 28 | 864 | 23 | 98 |
| 42 | 71.1 | 337 | 0.21 | 0.07035 | 0.00304 | | 1.42402 | 0.06156 | 0.14615 | 0.00409 | |  | | 939 | 69 | 899 | 26 | 879 | 23 | 98 |
| 43 | 186 | 399 | 0.47 | 0.06835 | 0.00315 | | 1.14520 | 0.05024 | 0.12164 | 0.00330 | |  | | 879 | 73 | 775 | 24 | 740 | 19 | 95 |
| 44 | 202 | 576 | 0.35 | 0.06966 | 0.00303 | | 1.31345 | 0.05555 | 0.13619 | 0.00363 | |  | | 918 | 69 | 852 | 24 | 823 | 21 | 97 |
| 45 | 84.2 | 179 | 0.47 | 0.06268 | 0.00375 | | 0.63519 | 0.03689 | 0.07355 | 0.00205 | |  | | 697 | 111 | 499 | 23 | 458 | 12 | 91 |
| 46 | 167 | 383 | 0.44 | 0.07216 | 0.00336 | | 1.56414 | 0.07172 | 0.15672 | 0.00429 | |  | | 990 | 77 | 956 | 28 | 939 | 24 | 98 |
| 47 | 410 | 610 | 0.67 | 0.05310 | 0.00228 | | 0.55939 | 0.02374 | 0.07609 | 0.00204 | |  | | 333 | 76 | 451 | 15 | 473 | 12 | 95 |
| 48 | 508 | 809 | 0.63 | 0.07056 | 0.00298 | | 1.47255 | 0.06122 | 0.15014 | 0.00401 | |  | | 945 | 67 | 919 | 25 | 902 | 22 | 98 |
| 49 | 127 | 213 | 0.60 | 0.04874 | 0.00659 | | 0.44071 | 0.05792 | 0.06558 | 0.00211 | |  | | 135 | 273 | 371 | 41 | 409 | 13 | 90 |
| 50 | 167 | 357 | 0.47 | 0.05447 | 0.00265 | | 0.53684 | 0.02616 | 0.07124 | 0.00198 | |  | | 391 | 92 | 436 | 17 | 444 | 12 | 98 |
| 51 | 98.1 | 63.1 | 1.55 | 0.07630 | 0.00407 | | 2.01783 | 0.10446 | 0.19203 | 0.00566 | |  | | 1103 | 87 | 1122 | 35 | 1132 | 31 | 99 |
| 52 | 217 | 732 | 0.30 | 0.05710 | 0.00238 | | 0.61013 | 0.02474 | 0.07661 | 0.00209 | |  | | 495 | 68 | 484 | 16 | 476 | 13 | 98 |
| 53 | 306 | 223 | 1.37 | 0.06999 | 0.00322 | | 1.28646 | 0.05722 | 0.13195 | 0.00372 | |  | | 928 | 72 | 840 | 25 | 799 | 21 | 95 |
| 54 | 241 | 119 | 2.02 | 0.09261 | 0.00468 | | 2.07017 | 0.09970 | 0.16056 | 0.00461 | |  | | 1480 | 75 | 1139 | 33 | 960 | 26 | 83 |
| 55 | 442 | 825 | 0.54 | 0.05703 | 0.00281 | | 0.58250 | 0.02742 | 0.07299 | 0.00208 | |  | | 493 | 85 | 466 | 18 | 454 | 12 | 97 |
| 56 | 290 | 1538 | 0.19 | 0.07333 | 0.00515 | | 1.08132 | 0.06908 | 0.10695 | 0.00313 | |  | | 1023 | 147 | 744 | 34 | 655 | 18 | 87 |
| 57 | 86.9 | 62.0 | 1.40 | 0.06775 | 0.01081 | | 0.82986 | 0.12848 | 0.08884 | 0.00344 | |  | | 861 | 354 | 614 | 71 | 549 | 20 | 89 |
| 58 | 179 | 153 | 1.17 | 0.05695 | 0.00333 | | 0.53609 | 0.02995 | 0.06862 | 0.00199 | |  | | 489 | 108 | 436 | 20 | 428 | 12 | 98 |
| 59 | 107 | 232 | 0.46 | 0.06087 | 0.00304 | | 0.58631 | 0.02834 | 0.06969 | 0.00199 | |  | | 635 | 86 | 469 | 18 | 434 | 12 | 92 |
| 60 | 547 | 599 | 0.91 | 0.08025 | 0.00302 | | 2.13161 | 0.07894 | 0.19077 | 0.00512 | |  | | 1203 | 51 | 1159 | 26 | 1126 | 28 | 97 |
| 61 | 79.2 | 522 | 0.15 | 0.07394 | 0.00404 | | 1.44528 | 0.06896 | 0.14178 | 0.00379 | |  | | 1040 | 113 | 908 | 29 | 855 | 21 | 94 |
| 62 | 182 | 252 | 0.72 | 0.07382 | 0.00292 | | 1.46046 | 0.05807 | 0.14222 | 0.00390 | |  | | 1037 | 60 | 914 | 24 | 857 | 22 | 94 |
| 63 | 573 | 1337 | 0.43 | 0.07014 | 0.00252 | | 1.31398 | 0.04762 | 0.13456 | 0.00365 | |  | | 933 | 51 | 852 | 21 | 814 | 21 | 95 |
| 64 | 134 | 125 | 1.07 | 0.11365 | 0.00464 | | 4.43284 | 0.17896 | 0.28146 | 0.00816 | |  | | 1859 | 52 | 1718 | 33 | 1599 | 41 | 93 |
| 65 | 315 | 1043 | 0.30 | 0.05833 | 0.00243 | | 0.57280 | 0.02400 | 0.07047 | 0.00196 | |  | | 542 | 70 | 460 | 15 | 439 | 12 | 95 |
| 66 | 182 | 514 | 0.35 | 0.15868 | 0.00583 | | 9.67904 | 0.35804 | 0.43720 | 0.01197 | |  | | 2442 | 43 | 2405 | 34 | 2338 | 54 | 97 |
| 67 | 151 | 166 | 0.91 | 0.04605 | 0.01715 | | 0.44652 | 0.16490 | 0.07033 | 0.00339 | |  | | 1798 | 606 | 375 | 116 | 438 | 20 | 85 |
| 68 | 882 | 1312 | 0.67 | 0.08580 | 0.00309 | | 2.75162 | 0.10394 | 0.22929 | 0.00633 | |  | | 1334 | 51 | 1343 | 28 | 1331 | 33 | 99 |
| 69 | 19.6 | 1475 | 0.01 | 0.05892 | 0.00241 | | 0.64867 | 0.02641 | 0.07910 | 0.00214 | |  | | 564 | 68 | 508 | 16 | 491 | 13 | 97 |
| 70 | 399 | 960 | 0.42 | 0.05751 | 0.00223 | | 0.65344 | 0.02508 | 0.08160 | 0.00223 | |  | | 511 | 61 | 511 | 15 | 506 | 13 | 99 |
| 71 | 386 | 640 | 0.60 | 0.04605 | 0.01466 | | 0.50350 | 0.15690 | 0.07931 | 0.00516 | |  | | 2906 | 513 | 414 | 106 | 492 | 31 | 83 |
| 72 | 503 | 1156 | 0.43 | 0.06624 | 0.00245 | | 1.33991 | 0.04959 | 0.14555 | 0.00390 | |  | | 814 | 55 | 863 | 22 | 876 | 22 | 99 |
| 73 | 664 | 1649 | 0.40 | 0.05579 | 0.00214 | | 0.56496 | 0.02179 | 0.07302 | 0.00198 | |  | | 444 | 62 | 455 | 14 | 454 | 12 | 100 |
| 74 | 205 | 385 | 0.53 | 0.05596 | 0.00258 | | 0.54758 | 0.02573 | 0.07047 | 0.00191 | |  | | 451 | 87 | 443 | 17 | 439 | 11 | 99 |
| 75 | 113 | 168 | 0.67 | 0.06542 | 0.00311 | | 1.20959 | 0.05782 | 0.13366 | 0.00366 | |  | | 788 | 84 | 805 | 27 | 809 | 21 | 100 |
| 76 | 615 | 1196 | 0.51 | 0.05807 | 0.00261 | | 0.64675 | 0.02978 | 0.08025 | 0.00217 | |  | | 533 | 84 | 506 | 18 | 498 | 13 | 98 |
| 77 | 715 | 1038 | 0.69 | 0.06647 | 0.00274 | | 1.26049 | 0.05325 | 0.13636 | 0.00366 | |  | | 821 | 70 | 828 | 24 | 824 | 21 | 100 |
| 78 | 204 | 245 | 0.83 | 0.06294 | 0.00293 | | 0.93017 | 0.04486 | 0.10603 | 0.00295 | |  | | 706 | 86 | 668 | 24 | 650 | 17 | 97 |
| 79 | 249 | 301 | 0.83 | 0.06739 | 0.00288 | | 1.26212 | 0.05373 | 0.13455 | 0.00362 | |  | | 850 | 70 | 829 | 24 | 814 | 21 | 98 |
| 80 | 78.5 | 128 | 0.61 | 0.09839 | 0.00424 | | 3.85644 | 0.16278 | 0.28243 | 0.00776 | |  | | 1594 | 61 | 1605 | 34 | 1604 | 39 | 100 |
| Sample XS004 | | | | | | | | | | | | | | | | | | | | |
| 01 | 126 | 153 | 0.82 | 0.06987 | 0.0074 | | 0.70622 | 0.07092 | 0.07331 | 0.00248 | |  | | 925 | 227 | 543 | 42 | 456 | 15 | 83 |
| 02 | 251 | 1130 | 0.22 | 0.06647 | 0.00233 | | 0.64498 | 0.0215 | 0.07035 | 0.0019 | |  | | 821 | 42 | 505 | 13 | 438 | 11 | 86 |
| 03 | 91.6 | 393 | 0.23 | 0.07331 | 0.00429 | | 1.39872 | 0.07091 | 0.13837 | 0.00403 | |  | | 1023 | 122 | 888 | 30 | 835 | 23 | 94 |
| 04 | 576 | 648 | 0.89 | 0.06018 | 0.00633 | | 0.56608 | 0.05693 | 0.06823 | 0.00209 | |  | | 610 | 237 | 455 | 37 | 425 | 13 | 93 |
| 05 | 199 | 155 | 1.29 | 63.31331 | 0.51205 | | 0.03542 | 46.32041 | 6.17347 | 0.43859 | |  | | 4276 | 101 | 3916 | 132 | 2344 | 234 | 49 |
| 06 | 199 | 155 | 1.29 | 0.10326 | 0.00352 | | 3.96056 | 0.13497 | 0.27811 | 0.00756 | |  | | 1683 | 39 | 1626 | 28 | 1582 | 38 | 97 |
| 07 | 146 | 331 | 0.44 | 0.06053 | 0.00247 | | 0.59726 | 0.02310 | 0.07018 | 0.00192 | |  | | 623 | 60 | 475 | 15 | 437 | 12 | 92 |
| 08 | 542 | 737 | 0.73 | 0.07230 | 0.00281 | | 1.60206 | 0.06012 | 0.16081 | 0.00445 | |  | | 994 | 53 | 971 | 23 | 961 | 25 | 99 |
| 09 | 305 | 557 | 0.55 | 0.09673 | 0.00427 | | 3.80955 | 0.14948 | 0.26122 | 0.00727 | |  | | 1562 | 53 | 1595 | 32 | 1496 | 37 | 94 |
| 10 | 160 | 132 | 1.21 | 0.07406 | 0.00724 | | 1.42752 | 0.13223 | 0.13980 | 0.00435 | |  | | 1043 | 205 | 901 | 55 | 844 | 25 | 93 |
| 11 | 340 | 381 | 0.89 | 0.09317 | 0.00698 | | 3.33831 | 0.22983 | 0.25988 | 0.00768 | |  | | 1491 | 146 | 1490 | 54 | 1489 | 39 | 100 |
| 12 | 114 | 148 | 0.77 | 0.04909 | 0.00815 | | 0.40099 | 0.06522 | 0.05924 | 0.00197 | |  | | 152 | 312 | 342 | 47 | 371 | 12 | 92 |
| 13 | 207 | 140 | 1.47 | 0.07139 | 0.00231 | | 1.56414 | 0.05050 | 0.15818 | 0.00424 | |  | | 969 | 38 | 956 | 20 | 947 | 24 | 99 |
| 14 | 275 | 1526 | 0.18 | 0.10317 | 0.00667 | | 4.13117 | 0.23858 | 0.29041 | 0.00842 | |  | | 1682 | 123 | 1660 | 47 | 1644 | 42 | 99 |
| 15 | 100 | 171 | 0.59 | 0.20215 | 0.0225 | | 10.76276 | 1.10852 | 0.38615 | 0.01629 | |  | | 2844 | 189 | 2503 | 96 | 2105 | 76 | 83 |
| 16 | 234 | 220 | 1.06 | 0.09474 | 0.00506 | | 2.23502 | 0.11517 | 0.17050 | 0.00491 | |  | | 1523 | 83 | 1192 | 36 | 1015 | 27 | 84 |
| 17 | 166 | 108 | 1.54 | 0.12236 | 0.00823 | | 4.30223 | 0.26202 | 0.25501 | 0.00730 | |  | | 1991 | 123 | 1694 | 50 | 1464 | 37 | 85 |
| 18 | 489 | 1042 | 0.47 | 0.10662 | 0.00451 | | 4.22883 | 0.13921 | 0.28765 | 0.00766 | |  | | 1743 | 79 | 1680 | 27 | 1630 | 38 | 97 |
| 19 | 40.7 | 417 | 0.10 | 0.10664 | 0.00864 | | 3.86732 | 0.29106 | 0.26302 | 0.00790 | |  | | 1743 | 153 | 1607 | 61 | 1505 | 40 | 93 |
| 20 | 102 | 234 | 0.43 | 0.07596 | 0.01691 | | 0.74463 | 0.16362 | 0.07110 | 0.00256 | |  | | 1094 | 494 | 565 | 95 | 443 | 15 | 76 |
| 21 | 331 | 516 | 0.64 | 0.05811 | 0.02147 | | 1.24539 | 0.45655 | 0.15543 | 0.00715 | |  | | 534 | 707 | 821 | 206 | 931 | 40 | 87 |
| 22 | 338 | 578 | 0.58 | 0.18566 | 0.00712 | | 12.13898 | 0.41011 | 0.46664 | 0.01308 | |  | | 2704 | 25 | 2615 | 32 | 2469 | 57 | 94 |
| 23 | 527 | 142 | 3.70 | 0.27976 | 0.09627 | | 12.00932 | 3.91264 | 0.31134 | 0.03447 | |  | | 3362 | 710 | 2605 | 305 | 1747 | 169 | 61 |
| 24 | 128 | 291 | 0.44 | 0.09845 | 0.00767 | | 3.76120 | 0.20655 | 0.25749 | 0.00892 | |  | | 1595 | 82 | 1585 | 44 | 1477 | 46 | 93 |
| 25 | 157 | 192 | 0.82 | 0.08313 | 0.00376 | | 0.82250 | 0.03196 | 0.07123 | 0.00208 | |  | | 1272 | 51 | 609 | 18 | 444 | 12 | 69 |
| 26 | 728 | 694 | 1.05 | 0.08200 | 0.00310 | | 1.98294 | 0.06991 | 0.17377 | 0.00471 | |  | | 1246 | 45 | 1110 | 24 | 1033 | 26 | 93 |
| 27 | 238 | 605 | 0.39 | 0.11397 | 0.00757 | | 3.10362 | 0.17088 | 0.19750 | 0.00735 | |  | | 1864 | 123 | 1434 | 42 | 1162 | 40 | 79 |
| 28 | 62.5 | 646 | 0.10 | 0.04605 | 0.00997 | | 0.51095 | 0.10801 | 0.08048 | 0.00379 | |  | | 2002 | 359 | 419 | 73 | 499 | 23 | 83 |
| 29 | 576 | 511 | 1.13 | 0.09385 | 0.02368 | | 1.40973 | 0.35097 | 0.10895 | 0.00449 | |  | | 1505 | 549 | 893 | 148 | 667 | 26 | 71 |
| 30 | 1239 | 1347 | 0.92 | 0.05854 | 0.00475 | | 0.58722 | 0.04443 | 0.07275 | 0.00212 | |  | | 550 | 183 | 469 | 28 | 453 | 13 | 97 |
| 31 | 665 | 1059 | 0.63 | 0.07471 | 0.00558 | | 1.81551 | 0.12455 | 0.17624 | 0.00519 | |  | | 1061 | 155 | 1051 | 45 | 1046 | 28 | 100 |
| 32 | 265 | 376 | 0.70 | 0.07655 | 0.00542 | | 1.49206 | 0.10809 | 0.16392 | 0.01102 | |  | | 1109 | 55 | 927 | 44 | 979 | 61 | 95 |
| 33 | 146 | 691 | 0.21 | 0.07140 | 0.00535 | | 1.59517 | 0.10983 | 0.16203 | 0.00478 | |  | | 969 | 158 | 968 | 43 | 968 | 26 | 100 |
| 34 | 104 | 181 | 0.57 | 0.05182 | 0.01275 | | 0.50201 | 0.12210 | 0.07026 | 0.00262 | |  | | 277 | 451 | 413 | 83 | 438 | 16 | 94 |
| 35 | 102 | 166 | 0.61 | 0.07948 | 0.01479 | | 2.03056 | 0.36963 | 0.18529 | 0.00712 | |  | | 1184 | 403 | 1126 | 124 | 1096 | 39 | 97 |
| 36 | 142 | 155 | 0.92 | 0.11698 | 0.01778 | | 5.17722 | 0.76048 | 0.32099 | 0.01255 | |  | | 1911 | 290 | 1849 | 125 | 1795 | 61 | 97 |
| 37 | 121 | 337 | 0.36 | 0.09193 | 0.00363 | | 2.99883 | 0.10711 | 0.23158 | 0.00641 | |  | | 1466 | 44 | 1407 | 27 | 1343 | 34 | 95 |
| 38 | 118 | 119 | 0.99 | 0.05986 | 0.00270 | | 0.74140 | 0.02695 | 0.08984 | 0.00240 | |  | | 598 | 100 | 563 | 16 | 555 | 14 | 99 |
| 39 | 21.8 | 1046 | 0.02 | 0.10652 | 0.00339 | | 3.14107 | 0.10337 | 0.21296 | 0.00581 | |  | | 1741 | 35 | 1443 | 25 | 1245 | 31 | 85 |
| 40 | 332 | 776 | 0.43 | 0.07257 | 0.07179 | | 1.06361 | 1.04647 | 0.10629 | 0.01087 | |  | | 1002 | 1540 | 736 | 515 | 651 | 63 | 88 |
| 41 | 319 | 548 | 0.58 | 0.09594 | 0.00416 | | 1.03893 | 0.04263 | 0.07863 | 0.00241 | |  | | 1547 | 52 | 723 | 21 | 488 | 14 | 61 |
| 42 | 1049 | 1652 | 0.63 | 0.09058 | 0.00384 | | 1.83198 | 0.07954 | 0.14336 | 0.00397 | |  | | 1438 | 65 | 1057 | 29 | 864 | 22 | 80 |
| 43 | 217 | 391 | 0.55 | 0.20115 | 0.01095 | | 4.59093 | 0.21456 | 0.16037 | 0.00482 | |  | | 2836 | 60 | 1748 | 39 | 959 | 27 | 42 |
| 44 | 128 | 136 | 0.94 | 0.06688 | 0.00362 | | 1.21900 | 0.05739 | 0.13219 | 0.00353 | |  | | 834 | 116 | 809 | 26 | 800 | 20 | 99 |
| 45 | 132 | 726 | 0.18 | 0.05536 | 0.01235 | | 0.55312 | 0.12136 | 0.07246 | 0.00290 | |  | | 427 | 433 | 447 | 79 | 451 | 17 | 99 |
| 46 | 398 | 425 | 0.94 | 0.06359 | 0.00603 | | 1.13310 | 0.10208 | 0.12923 | 0.00381 | |  | | 728 | 209 | 769 | 49 | 783 | 22 | 98 |
| 47 | 340 | 463 | 0.74 | 0.07880 | 0.00468 | | 1.66234 | 0.08724 | 0.15301 | 0.00425 | |  | | 1167 | 121 | 994 | 33 | 918 | 24 | 92 |
| 48 | 429 | 1237 | 0.35 | 0.07053 | 0.00346 | | 1.57536 | 0.06282 | 0.16199 | 0.00462 | |  | | 944 | 103 | 961 | 25 | 968 | 26 | 99 |
| 49 | 22.5 | 472 | 0.05 | 0.07457 | 0.01325 | | 1.13112 | 0.19762 | 0.11001 | 0.00358 | |  | | 1057 | 389 | 768 | 94 | 673 | 21 | 87 |
| 50 | 433 | 917 | 0.47 | 0.06414 | 0.00957 | | 0.61448 | 0.08928 | 0.06949 | 0.00234 | |  | | 746 | 334 | 486 | 56 | 433 | 14 | 88 |
| 51 | 222 | 248 | 0.89 | 0.13407 | 0.00663 | | 3.46908 | 0.14117 | 0.18766 | 0.00527 | |  | | 2152 | 89 | 1520 | 32 | 1109 | 29 | 69 |
| 52 | 456 | 1107 | 0.41 | 0.05643 | 0.00462 | | 0.57172 | 0.04384 | 0.07348 | 0.00211 | |  | | 469 | 187 | 459 | 28 | 457 | 13 | 100 |
| 53 | 208 | 564 | 0.37 | 0.09196 | 0.00619 | | 1.15390 | 0.07627 | 0.09264 | 0.00297 | |  | | 1467 | 113 | 779 | 36 | 571 | 18 | 69 |
| 54 | 55.0 | 535 | 0.10 | 0.07238 | 0.01348 | | 0.70537 | 0.12908 | 0.07068 | 0.00244 | |  | | 997 | 413 | 542 | 77 | 440 | 15 | 79 |
| 55 | 412 | 667 | 0.62 | 0.11695 | 0.00770 | | 3.59170 | 0.22762 | 0.21394 | 0.00604 | |  | | 1910 | 105 | 1548 | 50 | 1250 | 32 | 79 |
| 56 | 112 | 275 | 0.41 | 0.07989 | 0.01293 | | 1.02708 | 0.16137 | 0.09324 | 0.00360 | |  | | 1194 | 343 | 717 | 81 | 575 | 21 | 78 |
| 57 | 161 | 91.7 | 1.76 | 0.05672 | 0.00644 | | 0.56336 | 0.06133 | 0.07204 | 0.00230 | |  | | 481 | 258 | 454 | 40 | 448 | 14 | 99 |
| 58 | 205 | 237 | 0.86 | 0.04605 | 0.01589 | | 0.47758 | 0.16305 | 0.07522 | 0.00376 | |  | | 1635 | 557 | 396 | 112 | 468 | 23 | 83 |
| 59 | 950 | 911 | 1.04 | 0.14619 | 0.01921 | | 4.53428 | 0.5681 | 0.22496 | 0.00893 | |  | | 2302 | 237 | 1737 | 104 | 1308 | 47 | 72 |
| 60 | 101 | 303 | 0.33 | 0.16118 | 0.05610 | | 3.08731 | 1.05077 | 0.13892 | 0.01014 | |  | | 2468 | 781 | 1430 | 261 | 839 | 57 | 48 |
| 61 | 254 | 1115 | 0.23 | 0.08518 | 0.01022 | | 2.09274 | 0.24160 | 0.17818 | 0.00580 | |  | | 1320 | 244 | 1146 | 79 | 1057 | 32 | 92 |
| 62 | 88.8 | 549 | 0.16 | 0.04922 | 0.05779 | | 0.72135 | 0.84434 | 0.10630 | 0.01000 | |  | | 158 | 1385 | 551 | 498 | 651 | 58 | 83 |
| 63 | 227 | 547 | 0.41 | 0.06574 | 0.00318 | | 1.10328 | 0.04408 | 0.12172 | 0.00331 | |  | | 798 | 104 | 755 | 21 | 740 | 19 | 98 |
| 64 | 85.0 | 510 | 0.17 | 0.10069 | 0.00377 | | 2.39123 | 0.08066 | 0.17062 | 0.00476 | |  | | 1637 | 36 | 1240 | 24 | 1016 | 26 | 80 |
| 65 | 312 | 900 | 0.35 | 0.19179 | 0.01486 | | 5.00533 | 0.46924 | 0.16501 | 0.00566 | |  | | 2758 | 148 | 1820 | 79 | 985 | 31 | 40 |
| 66 | 78.8 | 141 | 0.56 | 0.09664 | 0.03975 | | 1.99673 | 0.80988 | 0.14985 | 0.01023 | |  | | 1560 | 943 | 1114 | 274 | 900 | 57 | 79 |
| 67 | 617 | 830 | 0.74 | 0.09158 | 0.00313 | | 3.03478 | 0.09844 | 0.23967 | 0.00675 | |  | | 1459 | 31 | 1416 | 25 | 1385 | 35 | 98 |
| 68 | 152 | 684 | 0.22 | 0.10722 | 0.00667 | | 2.11152 | 0.10312 | 0.15120 | 0.00524 | |  | | 1753 | 64 | 1153 | 34 | 908 | 29 | 76 |
| 69 | 55.2 | 197 | 0.28 | 0.11114 | 0.03813 | | 2.29209 | 0.77532 | 0.14957 | 0.00860 | |  | | 1818 | 766 | 1210 | 239 | 899 | 48 | 71 |
| 70 | 195 | 454 | 0.43 | 0.10928 | 0.01854 | | 2.41794 | 0.39869 | 0.16047 | 0.00639 | |  | | 1788 | 333 | 1248 | 118 | 959 | 36 | 74 |
| 71 | 462 | 879 | 0.53 | 0.04605 | 0.03676 | | 0.44992 | 0.35741 | 0.07087 | 0.00556 | |  | | 2405 | 1110 | 377 | 250 | 441 | 33 | 84 |
| 72 | 102 | 156 | 0.65 | 0.15887 | 0.01417 | | 9.45062 | 0.78569 | 0.43142 | 0.01390 | |  | | 2444 | 156 | 2383 | 76 | 2312 | 63 | 97 |
| 73 | 159 | 630 | 0.25 | 0.07449 | 0.01720 | | 1.69543 | 0.3849 | 0.16508 | 0.00691 | |  | | 1055 | 508 | 1007 | 145 | 985 | 38 | 98 |
| 74 | 124 | 330 | 0.37 | 0.13656 | 0.02922 | | 1.97557 | 0.41099 | 0.10492 | 0.00524 | |  | | 2184 | 414 | 1107 | 140 | 643 | 31 | 47 |
| 75 | 71.4 | 502 | 0.14 | 0.08377 | 0.01639 | | 2.05331 | 0.39379 | 0.17777 | 0.00683 | |  | | 1287 | 420 | 1133 | 131 | 1055 | 37 | 93 |
| 76 | 144 | 191 | 0.75 | 0.04605 | 0.01323 | | 0.91834 | 0.26086 | 0.14465 | 0.00620 | |  | | 3048 | 465 | 661 | 138 | 871 | 35 | 73 |
| 77 | 153 | 474 | 0.32 | 0.05765 | 0.00628 | | 0.57387 | 0.0601 | 0.07219 | 0.00217 | |  | | 517 | 247 | 461 | 39 | 449 | 13 | 97 |
| 78 | 574 | 549 | 1.05 | 0.08470 | 0.00461 | | 2.01116 | 0.09429 | 0.17221 | 0.00477 | |  | | 1309 | 108 | 1119 | 32 | 1024 | 26 | 91 |
| 79 | 145 | 1295 | 0.11 | 0.12042 | 0.01487 | | 3.22783 | 0.38072 | 0.19441 | 0.0071 | |  | | 1962 | 231 | 1464 | 91 | 1145 | 38 | 76 |
| 80 | 517 | 921 | 0.56 | 0.23380 | 0.16268 | | 13.15607 | 8.79274 | 0.40812 | 0.07904 | |  | | 3078 | 2027 | 2691 | 631 | 2206 | 362 | 80 |
| Sample XS27 | | | | | | | | | | | | | | | | | | | | |
| 01 | 1151 | 734 | 1.57 | 0.18168 | 0.05610 | | 5.69692 | 1.70330 | 0.22742 | 0.01756 | |  | | 2668 | 642 | 1931 | 258 | 1321 | 92 | 62 |
| 02 | 305 | 745 | 0.41 | 0.06074 | 0.00669 | | 0.50267 | 0.05342 | 0.06002 | 0.00174 | |  | | 630 | 248 | 414 | 36 | 376 | 11 | 90 |
| 03 | 70 | 90 | 0.77 | 0.11174 | 0.00380 | | 4.31471 | 0.14317 | 0.28234 | 0.00760 | |  | | 1828 | 36 | 1696 | 27 | 1603 | 38 | 94 |
| 04 | 53 | 123 | 0.43 | 0.09302 | 0.03651 | | 0.99422 | 0.38593 | 0.07752 | 0.00452 | |  | | 1488 | 881 | 701 | 197 | 481 | 27 | 63 |
| 05 | 135 | 382 | 0.35 | 0.06912 | 0.00446 | | 1.23822 | 0.07233 | 0.12992 | 0.00356 | |  | | 902 | 137 | 818 | 33 | 787 | 20 | 96 |
| 06 | 331 | 579 | 0.57 | 0.07342 | 0.00255 | | 1.63948 | 0.05506 | 0.16170 | 0.00435 | |  | | 1026 | 42 | 986 | 21 | 966 | 24 | 98 |
| 07 | 93 | 646 | 0.14 | 0.09600 | 0.02031 | | 3.34334 | 0.69560 | 0.25258 | 0.00972 | |  | | 1548 | 444 | 1491 | 163 | 1452 | 50 | 97 |
| 08 | 201 | 263 | 0.76 | 0.06912 | 0.00314 | | 1.28011 | 0.05430 | 0.13426 | 0.00367 | |  | | 902 | 68 | 837 | 24 | 812 | 21 | 97 |
| 09 | 112 | 297 | 0.38 | 0.06577 | 0.00702 | | 1.08734 | 0.11170 | 0.11990 | 0.00349 | |  | | 799 | 234 | 747 | 54 | 730 | 20 | 98 |
| 10 | 100 | 313 | 0.32 | 0.07623 | 0.00264 | | 1.87387 | 0.06565 | 0.17904 | 0.00482 | |  | | 1101 | 46 | 1072 | 23 | 1062 | 26 | 99 |
| 11 | 239 | 380 | 0.63 | 0.04605 | 0.18456 | | 0.50151 | 2.00518 | 0.07899 | 0.02221 | |  | | 3590 | 135 | 413 | 1356 | 490 | 133 | 83 |
| 12 | 407 | 779 | 0.52 | 0.06851 | 0.00216 | | 1.25694 | 0.03933 | 0.13492 | 0.00355 | |  | | 884 | 36 | 827 | 18 | 816 | 20 | 99 |
| 13 | 113 | 136 | 0.83 | 0.09924 | 0.00585 | | 3.23789 | 0.11749 | 0.23186 | 0.00689 | |  | | 1610 | 40 | 1466 | 28 | 1344 | 36 | 91 |
| 14 | 212 | 299 | 0.71 | 0.18653 | 0.00564 | | 12.16285 | 0.36318 | 0.48384 | 0.01278 | |  | | 2712 | 24 | 2617 | 28 | 2544 | 56 | 97 |
| 15 | 148 | 469 | 0.32 | 0.08075 | 0.00424 | | 2.07562 | 0.09194 | 0.18643 | 0.00526 | |  | | 1215 | 106 | 1141 | 30 | 1102 | 29 | 97 |
| 16 | 32 | 575 | 0.06 | 0.12142 | 0.00387 | | 5.46931 | 0.17179 | 0.33720 | 0.00912 | |  | | 1977 | 29 | 1896 | 27 | 1873 | 44 | 99 |
| 17 | 108 | 1108 | 0.10 | 0.11610 | 0.00475 | | 5.15763 | 0.16183 | 0.32219 | 0.00847 | |  | | 1897 | 75 | 1846 | 27 | 1800 | 41 | 97 |
| 18 | 96 | 323 | 0.30 | 0.16290 | 0.00493 | | 10.15023 | 0.30650 | 0.46360 | 0.01252 | |  | | 2486 | 23 | 2449 | 28 | 2455 | 55 | 100 |
| 19 | 475 | 509 | 0.93 | 0.08626 | 0.00291 | | 2.28171 | 0.06970 | 0.19652 | 0.00514 | |  | | 1344 | 31 | 1207 | 22 | 1157 | 28 | 96 |
| 20 | 132 | 180 | 0.73 | 0.06205 | 0.00815 | | 0.52876 | 0.06744 | 0.06180 | 0.00195 | |  | | 676 | 295 | 431 | 45 | 387 | 12 | 89 |
| 21 | 255 | 618 | 0.41 | 0.08461 | 0.01578 | | 1.89735 | 0.34774 | 0.16265 | 0.00561 | |  | | 1307 | 396 | 1080 | 122 | 971 | 31 | 89 |
| 22 | 172 | 271 | 0.63 | 0.13293 | 0.00618 | | 6.89498 | 0.26982 | 0.37861 | 0.01011 | |  | | 2137 | 51 | 2098 | 35 | 2070 | 47 | 99 |
| 23 | 121 | 257 | 0.47 | 0.09261 | 0.00304 | | 2.95950 | 0.09619 | 0.23318 | 0.00623 | |  | | 1480 | 36 | 1397 | 25 | 1351 | 33 | 97 |
| 24 | 283 | 740 | 0.38 | 0.09587 | 0.00946 | | 3.34356 | 0.31420 | 0.25295 | 0.00758 | |  | | 1545 | 192 | 1491 | 73 | 1454 | 39 | 97 |
| 25 | 636 | 786 | 0.81 | 0.05403 | 0.00505 | | 0.53101 | 0.04715 | 0.07128 | 0.00207 | |  | | 372 | 214 | 432 | 31 | 444 | 12 | 97 |
| 26 | 226 | 299 | 0.75 | 0.06774 | 0.00249 | | 1.13871 | 0.03986 | 0.12194 | 0.00330 | |  | | 861 | 47 | 772 | 19 | 742 | 19 | 96 |
| 27 | 72 | 878 | 0.08 | 0.07304 | 0.00311 | | 1.52965 | 0.05168 | 0.15189 | 0.00394 | |  | | 1015 | 88 | 942 | 21 | 912 | 22 | 97 |
| 28 | 338 | 327 | 1.04 | 0.05567 | 0.00296 | | 0.55412 | 0.02403 | 0.07903 | 0.00371 | |  | | 439 | 119 | 448 | 16 | 490 | 22 | 90 |
| 29 | 71 | 664 | 0.11 | 0.04605 | 0.01252 | | 0.79496 | 0.21225 | 0.12522 | 0.00637 | |  | | 2409 | 442 | 594 | 120 | 761 | 37 | 75 |
| 30 | 149 | 176 | 0.85 | 0.12233 | 0.00365 | | 5.88138 | 0.17593 | 0.34794 | 0.00923 | |  | | 1990 | 25 | 1958 | 26 | 1925 | 44 | 98 |
| 31 | 211 | 499 | 0.42 | 0.12153 | 0.00362 | | 5.72509 | 0.17193 | 0.34083 | 0.00902 | |  | | 1979 | 26 | 1935 | 26 | 1891 | 43 | 98 |
| 32 | 219 | 1275 | 0.17 | 0.05879 | 0.00283 | | 0.66579 | 0.02680 | 0.08214 | 0.00217 | |  | | 559 | 108 | 518 | 16 | 509 | 13 | 98 |
| 33 | 70 | 264 | 0.26 | 0.12349 | 0.00988 | | 2.46021 | 0.22984 | 0.13446 | 0.00398 | |  | | 2007 | 163 | 1260 | 67 | 813 | 23 | 57 |
| 34 | 111 | 663 | 0.17 | 0.10282 | 0.01384 | | 3.49219 | 0.45826 | 0.24634 | 0.00744 | |  | | 1676 | 262 | 1525 | 104 | 1420 | 38 | 93 |
| 35 | 698 | 456 | 1.53 | 0.16345 | 0.00499 | | 11.01430 | 0.32614 | 0.47647 | 0.01281 | |  | | 2492 | 21 | 2524 | 28 | 2512 | 56 | 100 |
| 36 | 176 | 260 | 0.68 | 0.04605 | 0.04306 | | 0.74310 | 0.69124 | 0.11705 | 0.01114 | |  | | 2168 | 1197 | 564 | 403 | 714 | 64 | 77 |
| 37 | 211 | 686 | 0.31 | 0.18189 | 0.00643 | | 11.51691 | 0.49223 | 0.45021 | 0.01247 | |  | | 2670 | 55 | 2566 | 40 | 2396 | 55 | 93 |
| 38 | 301 | 179 | 1.68 | 0.06515 | 0.01506 | | 1.24905 | 0.28427 | 0.13904 | 0.00567 | |  | | 779 | 487 | 823 | 128 | 839 | 32 | 98 |
| 39 | 267 | 1188 | 0.22 | 0.07113 | 0.00245 | | 1.15819 | 0.04488 | 0.11669 | 0.00326 | |  | | 961 | 56 | 781 | 21 | 712 | 19 | 91 |
| 40 | 254 | 233 | 1.09 | 0.09614 | 0.00324 | | 3.32948 | 0.10423 | 0.24545 | 0.00661 | |  | | 1551 | 31 | 1488 | 24 | 1415 | 34 | 95 |
| 41 | 404 | 430 | 0.94 | 0.06067 | 0.00352 | | 1.19763 | 0.04273 | 0.13699 | 0.00411 | |  | | 628 | 43 | 799 | 20 | 828 | 23 | 96 |
| 42 | 208 | 272 | 0.76 | 0.04605 | 0.02510 | | 0.46283 | 0.25091 | 0.07290 | 0.00418 | |  | | 2383 | 928 | 386 | 174 | 454 | 25 | 84 |
| 43 | 88 | 490 | 0.18 | 0.06283 | 0.00336 | | 1.00364 | 0.04618 | 0.11585 | 0.00315 | |  | | 703 | 117 | 706 | 23 | 707 | 18 | 100 |
| 44 | 77 | 109 | 0.71 | 0.08240 | 0.02017 | | 2.18446 | 0.52818 | 0.19228 | 0.00742 | |  | | 1255 | 539 | 1176 | 168 | 1134 | 40 | 96 |
| 45 | 67 | 119 | 0.56 | 0.08655 | 0.01740 | | 1.58640 | 0.31057 | 0.13293 | 0.00605 | |  | | 1351 | 430 | 965 | 122 | 805 | 34 | 82 |
| 46 | 156 | 443 | 0.35 | 0.11484 | 0.00385 | | 6.00778 | 0.17809 | 0.36790 | 0.01002 | |  | | 1877 | 22 | 1977 | 26 | 2020 | 47 | 98 |
| 47 | 504 | 1363 | 0.37 | 0.05901 | 0.00190 | | 0.58155 | 0.01860 | 0.07181 | 0.00192 | |  | | 567 | 39 | 465 | 12 | 447 | 12 | 96 |
| 48 | 720 | 1149 | 0.63 | 0.09236 | 0.00594 | | 3.01703 | 0.17399 | 0.23692 | 0.00676 | |  | | 1475 | 126 | 1412 | 44 | 1371 | 35 | 97 |
| 49 | 386 | 642 | 0.60 | 0.15096 | 0.00744 | | 7.66628 | 0.31260 | 0.36831 | 0.01018 | |  | | 2357 | 86 | 2193 | 37 | 2021 | 48 | 92 |
| 50 | 303 | 176 | 1.72 | 0.12115 | 0.00700 | | 2.34411 | 0.14009 | 0.13951 | 0.00386 | |  | | 1973 | 97 | 1226 | 43 | 842 | 22 | 63 |
| 51 | 170 | 921 | 0.18 | 0.11628 | 0.00713 | | 5.17706 | 0.28462 | 0.32289 | 0.00878 | |  | | 1900 | 113 | 1849 | 47 | 1804 | 43 | 98 |
| 52 | 537 | 601 | 0.89 | 0.06006 | 0.03242 | | 0.62663 | 0.33464 | 0.07567 | 0.00590 | |  | | 606 | 1055 | 494 | 209 | 470 | 35 | 95 |
| 53 | 141 | 298 | 0.48 | 0.08046 | 0.07339 | | 1.30339 | 1.18040 | 0.11749 | 0.01280 | |  | | 1208 | 1534 | 847 | 520 | 716 | 74 | 83 |
| 54 | 53 | 518 | 0.10 | 0.07698 | 0.00724 | | 1.66581 | 0.14916 | 0.15695 | 0.00453 | |  | | 1121 | 195 | 996 | 57 | 940 | 25 | 94 |
| 55 | 93 | 157 | 0.59 | 0.07466 | 0.00536 | | 1.90852 | 0.12477 | 0.18539 | 0.00549 | |  | | 1059 | 149 | 1084 | 44 | 1096 | 30 | 99 |
| 56 | 278 | 402 | 0.69 | 0.06553 | 0.01147 | | 0.71271 | 0.12148 | 0.07889 | 0.00316 | |  | | 791 | 389 | 546 | 72 | 489 | 19 | 89 |
| 57 | 171 | 205 | 0.83 | 0.06634 | 0.00595 | | 1.20335 | 0.10181 | 0.13157 | 0.00394 | |  | | 817 | 194 | 802 | 47 | 797 | 22 | 99 |
| 58 | 109 | 196 | 0.55 | 0.06214 | 0.00334 | | 0.61914 | 0.02468 | 0.07734 | 0.00291 | |  | | 679 | 29 | 489 | 15 | 480 | 17 | 98 |
| 59 | 71 | 116 | 0.62 | 0.06692 | 0.00704 | | 0.66545 | 0.06684 | 0.07212 | 0.00226 | |  | | 835 | 229 | 518 | 41 | 449 | 14 | 86 |
| 60 | 313 | 798 | 0.39 | 0.04605 | 0.01087 | | 0.81467 | 0.18905 | 0.12832 | 0.00551 | |  | | 2663 | 384 | 605 | 106 | 778 | 31 | 75 |
| 61 | 200 | 208 | 0.96 | 0.10054 | 0.00876 | | 3.85359 | 0.31303 | 0.27799 | 0.00879 | |  | | 1634 | 167 | 1604 | 65 | 1581 | 44 | 99 |
| 62 | 93 | 671 | 0.14 | 0.09189 | 0.00320 | | 3.47078 | 0.10263 | 0.26838 | 0.00720 | |  | | 1465 | 24 | 1521 | 23 | 1533 | 37 | 99 |
| 63 | 15 | 406 | 0.04 | 0.07321 | 0.00315 | | 1.70195 | 0.05681 | 0.16862 | 0.00460 | |  | | 1020 | 89 | 1009 | 21 | 1004 | 25 | 100 |
| 64 | 146 | 180 | 0.81 | 0.09375 | 0.00727 | | 3.20951 | 0.22859 | 0.24830 | 0.00763 | |  | | 1503 | 151 | 1459 | 55 | 1430 | 39 | 98 |
| 65 | 213 | 260 | 0.82 | 0.05475 | 0.00676 | | 0.52765 | 0.06313 | 0.06990 | 0.00215 | |  | | 402 | 282 | 430 | 42 | 436 | 13 | 99 |
| 66 | 182 | 224 | 0.81 | 0.08716 | 0.00339 | | 2.64574 | 0.08981 | 0.21874 | 0.00581 | |  | | 1364 | 42 | 1313 | 25 | 1275 | 31 | 97 |
| 67 | 101 | 148 | 0.69 | 0.05714 | 0.00280 | | 0.58160 | 0.02319 | 0.07537 | 0.00216 | |  | | 497 | 62 | 465 | 15 | 468 | 13 | 99 |
| 68 | 114 | 175 | 0.65 | 0.08345 | 0.01962 | | 1.66664 | 0.37151 | 0.14485 | 0.01084 | |  | | 1280 | 516 | 996 | 141 | 872 | 61 | 87 |
| 69 | 131 | 258 | 0.51 | 0.60235 | 0.35398 | | 17.98508 | 8.43494 | 0.21655 | 0.07668 | |  | | 4514 | 2286 | 2989 | 451 | 1264 | 406 | 19 |
| 70 | 171 | 564 | 0.30 | 0.09220 | 0.00576 | | 2.96784 | 0.16175 | 0.23345 | 0.00715 | |  | | 1472 | 122 | 1399 | 41 | 1353 | 37 | 97 |
| 71 | 133 | 128 | 1.04 | 0.06689 | 0.08248 | | 1.44667 | 1.77303 | 0.15685 | 0.02122 | |  | | 835 | 1718 | 908 | 736 | 939 | 118 | 97 |
| 72 | 255 | 463 | 0.55 | 0.04605 | 0.01851 | | 0.56127 | 0.22267 | 0.08841 | 0.00568 | |  | | 2103 | 661 | 452 | 145 | 546 | 34 | 81 |
| 73 | 75 | 349 | 0.22 | 0.09597 | 0.00499 | | 1.84648 | 0.08989 | 0.13815 | 0.00381 | |  | | 1547 | 77 | 1062 | 32 | 834 | 22 | 76 |
| 74 | 292 | 1536 | 0.19 | 0.05700 | 0.01482 | | 0.63797 | 0.16378 | 0.08117 | 0.00329 | |  | | 492 | 504 | 501 | 102 | 503 | 20 | 100 |
| 75 | 163 | 305 | 0.53 | 0.04605 | 0.02090 | | 0.59728 | 0.26958 | 0.09408 | 0.00460 | |  | | 2437 | 761 | 476 | 171 | 580 | 27 | 80 |
| 76 | 128 | 259 | 0.49 | 0.24315 | 0.02204 | | 5.55129 | 0.69301 | 0.09934 | 0.00590 | |  | | 3140 | 145 | 1909 | 107 | 611 | 34.6 | 14 |
| 77 | 210 | 223 | 0.94 | 0.09350 | 0.00802 | | 3.10077 | 0.24846 | 0.24053 | 0.00738 | |  | | 1498 | 168 | 1433 | 62 | 1389 | 38 | 97 |
| 78 | 358 | 723 | 0.50 | 0.11518 | 0.01333 | | 1.95153 | 0.20406 | 0.12288 | 0.00608 | |  | | 1883 | 218 | 1099 | 70 | 747 | 35 | 62 |
| 79 | 124 | 141 | 0.87 | 0.07256 | 0.01138 | | 1.24995 | 0.19171 | 0.12493 | 0.00406 | |  | | 1002 | 341 | 823 | 87 | 759 | 23 | 92 |
| 80 | 222 | 268 | 0.83 | 0.10027 | 0.00448 | | 2.26158 | 0.08651 | 0.16338 | 0.00435 | |  | | 1629 | 52 | 1200 | 27 | 976 | 24 | 79 |
| Sample XN8 | | | | | | | | | | | | | | | | | | | | |
| 01 | 52.4 | 1024 | 0.05 | 0.07130 | 0.01304 | | 1.34162 | 0.24078 | 0.13647 | 0.00479 | |  | | 966 | 406 | 864 | 104 | 825 | 27 | 95 |
| 02 | 171 | 341 | 0.50 | 0.07843 | 0.00491 | | 1.74036 | 0.09714 | 0.16094 | 0.00455 | |  | | 1158 | 128 | 1024 | 36 | 962 | 25 | 94 |
| 03 | 73.6 | 160 | 0.46 | 0.06049 | 0.00239 | | 0.59684 | 0.02253 | 0.07106 | 0.00197 | |  | | 621 | 57 | 475 | 14 | 443 | 12 | 93 |
| 04 | 219 | 269 | 0.81 | 0.09772 | 0.10525 | | 1.76339 | 1.87956 | 0.13088 | 0.02030 | |  | | 1581 | 2054 | 1032 | 691 | 793 | 116 | 74 |
| 05 | 231 | 185 | 1.25 | 0.04605 | 0.01481 | | 0.84390 | 0.26561 | 0.13292 | 0.00873 | |  | | 2976 | 519 | 621 | 146 | 805 | 50 | 74 |
| 06 | 389 | 538 | 0.72 | 0.05717 | 0.00235 | | 0.58563 | 0.02338 | 0.07303 | 0.00208 | |  | | 498 | 63 | 468 | 15 | 454 | 12 | 97 |
| 07 | 141 | 805 | 0.18 | 0.07169 | 0.00361 | | 1.79632 | 0.06987 | 0.17753 | 0.00497 | |  | | 977 | 56 | 1044 | 25 | 1053 | 27 | 99 |
| 08 | 122 | 462 | 0.26 | 0.07377 | 0.00494 | | 1.72083 | 0.10409 | 0.16919 | 0.00486 | |  | | 1035 | 139 | 1016 | 39 | 1008 | 27 | 99 |
| 09 | 72.9 | 290 | 0.25 | 0.06503 | 0.01077 | | 0.62401 | 0.10111 | 0.06960 | 0.00240 | |  | | 775 | 373 | 492 | 63 | 434 | 14 | 87 |
| 10 | 217 | 266 | 0.82 | 0.09887 | 0.02661 | | 3.02734 | 0.80270 | 0.22207 | 0.01031 | |  | | 1603 | 590 | 1415 | 202 | 1293 | 54 | 91 |
| 11 | 36.5 | 73.5 | 0.50 | 0.06738 | 0.00908 | | 0.59829 | 0.07820 | 0.06440 | 0.00213 | |  | | 850 | 296 | 476 | 50 | 402 | 13 | 83 |
| 12 | 263 | 383 | 0.69 | 0.07311 | 0.00516 | | 1.61324 | 0.10476 | 0.16003 | 0.00442 | |  | | 1017 | 147 | 975 | 41 | 957 | 25 | 98 |
| 13 | 95.0 | 953 | 0.10 | 0.07975 | 0.00510 | | 1.73526 | 0.09546 | 0.15781 | 0.00515 | |  | | 1191 | 130 | 1022 | 35 | 945 | 29 | 92 |
| 14 | 165 | 1101 | 0.15 | 0.07097 | 0.00438 | | 1.57459 | 0.08675 | 0.16092 | 0.00448 | |  | | 957 | 130 | 960 | 34 | 962 | 25 | 100 |
| 15 | 110 | 310 | 0.36 | 0.07542 | 0.00570 | | 1.43709 | 0.10041 | 0.13820 | 0.00398 | |  | | 1080 | 156 | 905 | 42 | 834 | 23 | 92 |
| 16 | 247 | 413 | 0.60 | 0.06624 | 0.00482 | | 1.36893 | 0.09155 | 0.14988 | 0.00431 | |  | | 814 | 157 | 876 | 39 | 900 | 24 | 97 |
| 17 | 36.8 | 183 | 0.20 | 0.06816 | 0.02017 | | 0.67068 | 0.19647 | 0.07136 | 0.00297 | |  | | 873 | 610 | 521 | 119 | 444 | 18 | 84 |
| 18 | 491 | 963 | 0.51 | 0.13388 | 0.01068 | | 7.35725 | 0.54324 | 0.39855 | 0.01207 | |  | | 2150 | 144 | 2156 | 66 | 2162 | 56 | 100 |
| 19 | 103 | 186 | 0.55 | 0.05341 | 0.01767 | | 0.52318 | 0.17168 | 0.07105 | 0.00298 | |  | | 346 | 596 | 427 | 114 | 442 | 18 | 97 |
| 20 | 492 | 772 | 0.64 | 0.07158 | 0.00491 | | 1.20025 | 0.06404 | 0.12437 | 0.00334 | |  | | 974 | 96 | 801 | 30 | 756 | 19 | 94 |
| 21 | 357 | 720 | 0.50 | 0.10106 | 0.00874 | | 4.18471 | 0.34039 | 0.30031 | 0.00881 | |  | | 1644 | 166 | 1671 | 67 | 1693 | 44 | 99 |
| 22 | 218 | 494 | 0.44 | 0.06825 | 0.00746 | | 1.26883 | 0.13252 | 0.13484 | 0.00437 | |  | | 876 | 237 | 832 | 59 | 815 | 25 | 98 |
| 23 | 118 | 123 | 0.95 | 0.10596 | 0.01571 | | 1.10872 | 0.15807 | 0.07589 | 0.00310 | |  | | 1731 | 289 | 758 | 76 | 472 | 19 | 53 |
| 24 | 67.4 | 168 | 0.40 | 0.05733 | 0.00762 | | 0.55526 | 0.07181 | 0.07025 | 0.00214 | |  | | 504 | 303 | 448 | 47 | 438 | 13 | 98 |
| 25 | 745 | 807 | 0.92 | 0.10958 | 0.02611 | | 2.19813 | 0.51344 | 0.14549 | 0.00682 | |  | | 1792 | 498 | 1180 | 163 | 876 | 38 | 70 |
| 26 | 259 | 581 | 0.45 | 0.13922 | 0.00648 | | 4.77193 | 0.18270 | 0.24859 | 0.00656 | |  | | 2218 | 83 | 1780 | 32 | 1431 | 34 | 78 |
| 27 | 158 | 1210 | 0.13 | 0.07659 | 0.01559 | | 1.65153 | 0.33086 | 0.15640 | 0.00569 | |  | | 1110 | 445 | 990 | 127 | 937 | 32 | 94 |
| 28 | 116 | 164 | 0.70 | 0.09069 | 0.00725 | | 3.10909 | 0.23251 | 0.24865 | 0.00706 | |  | | 1440 | 157 | 1435 | 57 | 1432 | 36 | 100 |
| 29 | 156 | 335 | 0.47 | 0.04605 | 0.01963 | | 0.45175 | 0.19121 | 0.07116 | 0.00356 | |  | | 2805 | 706 | 379 | 134 | 443 | 21 | 84 |
| 30 | 200 | 286 | 0.70 | 0.09518 | 0.01070 | | 2.93026 | 0.31628 | 0.22329 | 0.00702 | |  | | 1532 | 221 | 1390 | 82 | 1299 | 37 | 93 |
| 31 | 656 | 1355 | 0.48 | 0.05416 | 0.02168 | | 0.55136 | 0.21928 | 0.07383 | 0.00340 | |  | | 378 | 733 | 446 | 144 | 459 | 20 | 97 |
| 32 | 271 | 495 | 0.55 | 0.31457 | 0.02417 | | 4.32878 | 1.14611 | 0.05667 | 0.01012 | |  | | 3544 | 118.515 | 1699 | 218 | 355 | 62 | 31 |
| 33 | 165 | 191 | 0.86 | 0.12041 | 0.01172 | | 4.72418 | 0.43197 | 0.28456 | 0.00948 | |  | | 1962 | 180 | 1772 | 77 | 1614 | 48 | 91 |
| 34 | 138 | 178 | 0.78 | 0.07354 | 0.00423 | | 1.61254 | 0.08161 | 0.15903 | 0.00435 | |  | | 1029 | 120 | 975 | 32 | 951 | 24 | 98 |
| 35 | 113 | 313 | 0.36 | 0.04605 | 0.01347 | | 0.64078 | 0.17745 | 0.10093 | 0.00950 | |  | | 3278 | 473 | 503 | 110 | 620 | 56 | 79 |
| 36 | 160 | 268 | 0.60 | 0.08152 | 0.00511 | | 2.54602 | 0.14351 | 0.22651 | 0.00623 | |  | | 1234 | 126 | 1285 | 41 | 1316 | 33 | 98 |
| 37 | 96.4 | 387 | 0.25 | 0.16078 | 0.12120 | | 6.53742 | 4.82093 | 0.29490 | 0.04611 | |  | | 2464 | 1829 | 2051 | 649 | 1666 | 230 | 79 |
| 38 | 66.4 | 88.8 | 0.75 | 0.08107 | 0.02266 | | 2.35088 | 0.64800 | 0.21031 | 0.00974 | |  | | 1223 | 604 | 1228 | 196 | 1230 | 52 | 100 |
| 39 | 71.2 | 268 | 0.27 | 0.04605 | 0.03821 | | 0.71222 | 0.58878 | 0.11218 | 0.00812 | |  | | 3540 | 1108 | 546 | 349 | 685 | 47 | 77 |
| 40 | 178 | 121 | 1.47 | 0.04605 | 0.09068 | | 1.65525 | 3.23131 | 0.26072 | 0.06757 | |  | | 3655 | 2015 | 992 | 1236 | 1494 | 346 | 60 |
| 41 | 48.9 | 98.4 | 0.50 | 0.09306 | 0.00652 | | 3.68972 | 0.17581 | 0.30576 | 0.01205 | |  | | 1489 | 52 | 1569 | 38 | 1720 | 60 | 91 |
| 42 | 180 | 223 | 0.81 | 0.07331 | 0.00901 | | 1.45202 | 0.17158 | 0.14366 | 0.00488 | |  | | 1022 | 262 | 911 | 71 | 865 | 27 | 95 |
| 43 | 79.7 | 76.9 | 1.04 | 0.05861 | 0.00423 | | 0.07989 | 0.00881 | 0.01270 | 0.00149 | |  | | 554 | 157.385 | 78.0 | 8 | 81.4 | 9 | 55 |
| 44 | 822 | 1932 | 0.43 | 0.07853 | 0.02817 | | 1.12822 | 0.40015 | 0.10420 | 0.00563 | |  | | 1160 | 768 | 767 | 191 | 639 | 33 | 82 |
| 45 | 53.3 | 594 | 0.09 | 0.13671 | 0.08714 | | 3.96610 | 2.48400 | 0.21042 | 0.02496 | |  | | 2186 | 1506 | 1627 | 508 | 1231 | 133 | 72 |
| 46 | 241 | 331 | 0.73 | 0.10943 | 0.05357 | | 1.04363 | 0.50370 | 0.06917 | 0.00567 | |  | | 1790 | 1174 | 726 | 250 | 431 | 34 | 49 |
| 47 | 382 | 383 | 0.99 | 0.14574 | 0.04266 | | 2.60865 | 0.74658 | 0.12982 | 0.00796 | |  | | 2297 | 610 | 1303 | 210 | 787 | 45 | 51 |
| 48 | 128 | 2194 | 0.06 | 0.07085 | 0.01525 | | 1.32698 | 0.28167 | 0.13585 | 0.00486 | |  | | 953 | 478 | 858 | 123 | 821 | 28 | 96 |
| 49 | 209 | 261 | 0.80 | 0.06406 | 0.01100 | | 0.61857 | 0.10423 | 0.07004 | 0.00232 | |  | | 744 | 384 | 489 | 65 | 436 | 14 | 89 |
| 50 | 357 | 685 | 0.52 | 0.40706 | 0.02557 | | 27.18955 | 2.70684 | 0.36579 | 0.02441 | |  | | 3936 | 94.44 | 3390 | 98 | 2010 | 115 | 48 |
| 51 | 69.2 | 149 | 0.46 | 0.06140 | 0.02080 | | 1.10666 | 0.37178 | 0.13072 | 0.00570 | |  | | 653 | 667 | 757 | 179 | 792 | 32 | 95 |
| 52 | 234 | 383 | 0.61 | 0.07045 | 0.00348 | | 1.44287 | 0.05967 | 0.14853 | 0.00400 | |  | | 942 | 104 | 907 | 25 | 893 | 22 | 98 |
| 53 | 14.1 | 360 | 0.04 | 0.07529 | 0.00474 | | 0.72575 | 0.03110 | 0.06825 | 0.00199 | |  | | 1076 | 65 | 554 | 18 | 426 | 12 | 74 |
| 54 | 1031 | 954 | 1.08 | 0.06848 | 0.00214 | | 1.41372 | 0.04404 | 0.14870 | 0.00392 | |  | | 883 | 35 | 895 | 19 | 894 | 22 | 100 |
| 55 | 312 | 517 | 0.60 | 0.06649 | 0.00226 | | 1.19117 | 0.03937 | 0.12933 | 0.00341 | |  | | 822 | 42 | 797 | 18 | 784 | 19 | 98 |
| 56 | 243 | 332 | 0.73 | 0.06360 | 0.00328 | | 0.61604 | 0.02658 | 0.07028 | 0.00194 | |  | | 728 | 72 | 487 | 17 | 438 | 12 | 89 |
| 57 | 55.9 | 1247 | 0.04 | 0.08334 | 0.00834 | | 1.27478 | 0.12148 | 0.11094 | 0.00339 | |  | | 1277 | 203 | 835 | 54 | 678 | 20 | 79 |
| 58 | 105 | 180 | 0.58 | 0.04605 | 0.01235 | | 1.00652 | 0.26754 | 0.15854 | 0.00568 | |  | | 2683 | 438 | 707 | 135 | 949 | 32 | 71 |
| 59 | 274 | 294 | 0.93 | 0.08073 | 0.00468 | | 0.83489 | 0.04666 | 0.07421 | 0.00211 | |  | | 1215 | 97 | 616 | 26 | 461 | 13 | 71 |
| 60 | 934 | 894 | 1.05 | 0.08627 | 0.00314 | | 2.60404 | 0.08275 | 0.21808 | 0.00572 | |  | | 1344 | 35 | 1302 | 23 | 1272 | 30 | 98 |
| 61 | 62.2 | 972 | 0.06 | 0.16827 | 0.02943 | | 4.43125 | 0.74680 | 0.19100 | 0.00893 | |  | | 2540 | 315 | 1718 | 140 | 1127 | 48 | 58 |
| 62 | 120 | 444 | 0.27 | 0.10159 | 0.02362 | | 1.19704 | 0.27256 | 0.08546 | 0.00402 | |  | | 1653 | 492 | 799 | 126 | 529 | 24 | 59 |
| 63 | 232 | 254 | 0.91 | 0.09484 | 0.00950 | | 2.72501 | 0.25382 | 0.20839 | 0.00768 | |  | | 1525 | 196 | 1335 | 69 | 1220 | 41 | 91 |
| 64 | 451 | 885 | 0.51 | 0.06063 | 0.00662 | | 0.60911 | 0.06410 | 0.07287 | 0.00212 | |  | | 626 | 246 | 483 | 40 | 453 | 13 | 94 |
| 65 | 59.1 | 184 | 0.32 | 0.07498 | 0.01109 | | 1.81159 | 0.26014 | 0.17523 | 0.00622 | |  | | 1068 | 317 | 1050 | 94 | 1041 | 34 | 99 |
| 66 | 88.7 | 195 | 0.46 | 0.18715 | 0.02596 | | 12.72402 | 1.68955 | 0.49311 | 0.01979 | |  | | 2717 | 240 | 2659 | 125 | 2584 | 85 | 97 |
| 67 | 84.9 | 89.5 | 0.95 | 0.07922 | 0.01055 | | 1.52885 | 0.19764 | 0.13997 | 0.00449 | |  | | 1178 | 278 | 942 | 79 | 844 | 25 | 89 |
| 68 | 355 | 397 | 0.89 | 0.05866 | 0.00628 | | 0.59820 | 0.06153 | 0.07396 | 0.00221 | |  | | 555 | 242 | 476 | 39 | 460 | 13 | 97 |
| 69 | 223 | 335 | 0.67 | 0.22167 | 0.01774 | | 6.13462 | 0.57904 | 0.21113 | 0.01255 | |  | | 2993 | 121 | 1995 | 82 | 1235 | 67 | 53 |
| 70 | 100 | 54.9 | 1.82 | 0.06509 | 0.00943 | | 0.67541 | 0.09533 | 0.07526 | 0.00248 | |  | | 777 | 323 | 524 | 58 | 468 | 15 | 89 |
| 71 | 232 | 219 | 1.06 | 0.07559 | 0.00644 | | 1.75870 | 0.14059 | 0.16874 | 0.00494 | |  | | 1084 | 177 | 1030 | 52 | 1005 | 27 | 98 |
| 72 | 266 | 309 | 0.86 | 0.08426 | 0.01122 | | 2.61033 | 0.33367 | 0.22469 | 0.00837 | |  | | 1299 | 273 | 1304 | 94 | 1307 | 44 | 100 |
| 73 | 158 | 294 | 0.54 | 0.16046 | 0.01070 | | 10.11707 | 0.60178 | 0.45730 | 0.01381 | |  | | 2460 | 116 | 2446 | 55 | 2428 | 61 | 99 |
| 74 | 122 | 147 | 0.83 | 0.04605 | 0.00746 | | 0.45310 | 0.07095 | 0.07137 | 0.00298 | |  | | 1500 | 286 | 379 | 50 | 444 | 18 | 84 |
| 75 | 118 | 479 | 0.25 | 0.11850 | 0.00405 | | 2.96779 | 0.10528 | 0.18093 | 0.00483 | |  | | 1934 | 43 | 1399 | 27 | 1072 | 26 | 74 |
| 76 | 94.2 | 353 | 0.27 | 0.04605 | 0.13116 | | 0.91337 | 2.59573 | 0.14387 | 0.02774 | |  | | 4126 | 3336 | 659 | 1377 | 866 | 156 | 73 |
| 77 | 405 | 402 | 1.01 | 0.16730 | 0.00969 | | 3.97460 | 0.27881 | 0.16654 | 0.00495 | |  | | 2531 | 110 | 1629 | 57 | 993 | 27 | 51 |
| 78 | 86.1 | 381 | 0.23 | 0.08649 | 0.00820 | | 1.68400 | 0.14925 | 0.14121 | 0.00477 | |  | | 1349 | 190 | 1002 | 56 | 851 | 27 | 84 |
